# Supplementary material for: Defective excitation-contraction coupling and mitochondrial respiration precede mitochondrial Ca2+ accumulation in spinobulbar muscular atrophy skeletal muscle
Source: Research Square preprint supplement (doi:10.21203/rs.3.rs-1261384/v1), 2022-01-27
Supplement: Supplementary file 1 [file edfc5ad1955b7d89ee7eb6e3.xlsx]

## Sheet: downregulated
gene	logFC	AveExpr	t	P.Value	adj.P.Val	B
Stac3	-1.00002	15.0296	-5.38076	5.56451e-05	0.000443794	1.61967
Cma2	-1.00019	10.1473	-3.42431	0.00336121	0.0126306	-2.48847
Sep15	-1.00025	12.2958	-5.87038	2.11462e-05	0.000207982	2.60145
Inpp5j	-1.00062	8.81879	-4.09116	0.000808597	0.00386429	-1.07603
Enpp2	-1.00122	11.3772	-6.0003	1.64444e-05	0.000169525	2.85697
Pcsk1n	-1.00193	9.60234	-3.88763	0.00124801	0.00554249	-1.5086
Vwf	-1.00351	12.4508	-4.9063	0.000146143	0.000966988	0.642805
Tm4sf1	-1.00394	12.6383	-5.97087	1.7405e-05	0.000177642	2.79927
Ces1f	-1.0047	8.21576	-3.15662	0.00594438	0.0203193	-3.04619
Pycr2	-1.00562	11.6833	-11.2434	3.87362e-09	3.98533e-07	11.3178
Adcy9	-1.00672	12.1763	-5.7284	2.79059e-05	0.00025879	2.31976
Lyz1	-1.00751	9.08874	-3.61327	0.00224402	0.00903918	-2.09032
Speg	-1.00759	10.8502	-10.1738	1.64955e-08	1.0435e-06	9.86351
Neurl1a	-1.00858	15.045	-7.62929	8.53158e-07	1.70812e-05	5.8668
Lrrc14b	-1.00879	11.0073	-4.12066	0.000759414	0.0036807	-1.01334
H2-Q5	-1.00983	9.05059	-4.41788	0.000404731	0.00219721	-0.382966
Rgs10	-1.00984	9.58207	-6.11524	1.31891e-05	0.000143162	3.08119
Galnt16	-1.01112	10.2687	-4.95545	0.000132075	0.000891663	0.745031
Nme1	-1.01128	11.5637	-6.33293	8.72762e-06	0.000102625	3.50105
Chordc1	-1.01204	11.6219	-5.62254	3.43764e-05	0.000305144	2.10809
NAP114472-1	-1.01217	9.79599	-3.51173	0.00278839	0.0108164	-2.30463
Lrrc75a	-1.01234	10.2025	-5.69934	2.95458e-05	0.000270776	2.26179
Kcp	-1.01404	9.87627	-4.41725	0.000405265	0.00219836	-0.38429
Alkbh7	-1.01424	12.4325	-4.27823	0.000543582	0.00277619	-0.678788
Tspan8	-1.015	11.8911	-4.06831	0.000848887	0.00402524	-1.12458
Tmx2	-1.01585	10.752	-5.87491	2.09606e-05	0.000206469	2.61041
Vamp1	-1.01704	10.3602	-5.29628	6.59559e-05	0.000510968	1.44745
Slc46a1	-1.01746	8.66255	-8.43033	2.26621e-07	6.58046e-06	7.21368
Rs1	-1.0214	11.3509	-4.90608	0.00014621	0.000966988	0.642348
Dhodh	-1.02274	10.4508	-6.23474	1.05057e-05	0.000119146	3.31247
Atp13a2	-1.02376	12.3362	-6.12928	1.28399e-05	0.000140153	3.10847
Rhobtb2	-1.02388	10.3446	-9.29017	5.96263e-08	2.4877e-06	8.56657
Cxxc5	-1.02403	9.30803	-4.8772	0.000155187	0.00101329	0.582191
Abhd16a	-1.02434	11.4147	-7.21567	1.7479e-06	2.91576e-05	5.13722
Prrx2	-1.02449	8.43186	-6.08813	1.38912e-05	0.00014904	3.02846
Wdfy4	-1.0251	9.131	-5.55731	3.91175e-05	0.000336645	1.97701
Rnf128	-1.02525	12.1345	-3.34364	0.00399279	0.014637	-2.65746
S1pr3	-1.02543	9.33571	-5.0584	0.000106936	0.000754632	0.958409
H2-Aa	-1.02591	10.3511	-2.98798	0.00849085	0.0273086	-3.39206
Oas1a	-1.02686	8.53077	-3.94421	0.00110599	0.00501256	-1.38838
Ak6	-1.02767	10.8389	-6.81964	3.54917e-06	5.03657e-05	4.41649
Reep5	-1.028	10.6999	-7.48088	1.10068e-06	2.03469e-05	5.60772
Myoz1	-1.02806	17.0289	-5.5944	3.63443e-05	0.000318548	2.05161
Sec61b	-1.02881	10.6346	-7.6444	8.31462e-07	1.67816e-05	5.893
Gm1976	-1.02981	9.39734	-5.42557	5.08652e-05	0.000415016	1.71071
Lst1	-1.03261	9.48379	-6.86822	3.25011e-06	4.69772e-05	4.50606
Samd9l	-1.03329	9.31578	-10.2063	1.57591e-08	1.01337e-06	9.90949
Tagln2	-1.03545	10.7311	-4.44502	0.000382244	0.00209734	-0.325566
Ncf4	-1.03638	9.13799	-4.75461	0.000200039	0.00124285	0.326074
Adssl1	-1.03777	16.6394	-7.23363	1.69351e-06	2.85145e-05	5.16939
Mast4	-1.03935	9.43543	-8.09355	3.91765e-07	9.76107e-06	6.65787
Hist1h4i	-1.03968	10.8743	-4.78241	0.000188823	0.00118525	0.384257
Bola1	-1.0398	8.7973	-11.5998	2.44765e-09	2.8903e-07	11.7764
Hsd3b7	-1.04281	10.9695	-5.30665	6.45912e-05	0.000501792	1.46863
Actr6	-1.04506	10.5953	-8.55288	1.86343e-07	5.63774e-06	7.41223
Tada2a	-1.04668	10.3325	-6.22626	1.0676e-05	0.000120901	3.29612
1110019D14Rik	-1.04768	8.66147	-8.79361	1.27546e-07	4.24804e-06	7.79666
Cyb5b	-1.04771	10.2863	-8.8221	1.22006e-07	4.12105e-06	7.84166
Vwa3b	-1.04815	12.8086	-4.98055	0.000125435	0.000856034	0.797139
Tmem132a	-1.04878	9.48781	-4.23647	0.000593865	0.00299531	-0.767395
C1galt1c1	-1.04982	10.9722	-6.35737	8.33558e-06	9.92729e-05	3.54779
Cbfb	-1.05026	13.4548	-4.34857	0.000468454	0.00246419	-0.529686
2610507I01Rik	-1.05048	9.09844	-13.1611	3.71182e-10	8.92853e-08	13.6477
Nck2	-1.05089	11.5902	-6.80123	3.6699e-06	5.16277e-05	4.38245
Gdf10	-1.05101	8.97395	-3.65001	0.00207438	0.00846257	-2.01262
Col14a1	-1.05112	8.8225	-3.8951	0.00122826	0.00547253	-1.49274
Aoc3	-1.05243	9.08088	-4.89997	0.000148063	0.000976753	0.629631
Polk	-1.05379	8.54747	-8.28209	2.87861e-07	7.70376e-06	6.97087
Haghl	-1.05388	11.2353	-4.47006	0.00036263	0.00200972	-0.27265
Dpysl2	-1.05455	10.1651	-7.06542	2.28103e-06	3.57839e-05	4.86635
Ogfod3	-1.0548	10.6066	-7.23796	1.68065e-06	2.84347e-05	5.17714
Kcnab1	-1.05607	9.03858	-3.66264	0.0020191	0.00829088	-1.9859
Bcam	-1.05732	10.1404	-8.08861	3.94971e-07	9.82838e-06	6.64959
Hrsp12	-1.0584	9.47287	-6.74968	4.03114e-06	5.55515e-05	4.28691
Prl2c1	-1.06202	9.91295	-5.20996	7.85373e-05	0.000587643	1.27067
Fam78a	-1.0624	8.7349	-6.04379	1.51242e-05	0.000158601	2.94202
Mettl23	-1.06243	11.5422	-6.497	6.42088e-06	8.1184e-05	3.81327
Pfn1	-1.06262	11.2078	-3.70652	0.00183817	0.00766748	-1.89296
Ppm1l	-1.0627	12.0216	-6.49154	6.48643e-06	8.18004e-05	3.80294
Sypl	-1.06338	12.9459	-7.71802	7.33656e-07	1.5387e-05	6.02025
Gm6756	-1.06359	8.77521	-4.98504	0.000124283	0.000851152	0.806464
Cnih1	-1.06499	13.5738	-8.07841	4.01661e-07	9.95669e-06	6.63253
Flna	-1.06511	12.7952	-7.24652	1.65555e-06	2.81717e-05	5.19245
Csf2ra	-1.06546	9.56615	-4.33995	0.000477059	0.0025027	-0.547941
Psd3	-1.06568	8.93543	-11.3184	3.5136e-09	3.7206e-07	11.4154
Arhgdib	-1.06671	10.0601	-8.36869	2.50235e-07	7.00675e-06	7.11307
St3gal6	-1.06746	11.471	-6.61127	5.19639e-06	6.83174e-05	4.02855
P2ry1	-1.06953	9.70205	-5.41584	5.18652e-05	0.000420884	1.69097
NAP094642-001	-1.07023	11.7759	-7.17171	1.88889e-06	3.09281e-05	5.05829
Nek6	-1.07425	9.55516	-4.1486	0.000715611	0.00350502	-0.953966
Rasa4	-1.0744	12.0484	-7.92374	5.19104e-07	1.18019e-05	6.3719
Popdc2	-1.07449	12.5342	-5.21001	7.85305e-05	0.000587643	1.27076
3110062M04Rik	-1.07486	8.6862	-10.8206	6.77819e-09	5.80249e-07	10.7574
Hk2	-1.07501	12.2573	-4.53806	0.00031437	0.00179782	-0.129105
Gpx8	-1.07559	10.2999	-4.2337	0.000597356	0.00300747	-0.773264
Gtf3a	-1.07579	11.1853	-7.94224	5.03344e-07	1.15243e-05	6.40324
Sh3bgr	-1.07809	15.3307	-4.93772	0.000136981	0.000917791	0.708189
Cdk5	-1.07974	9.77183	-8.55581	1.85476e-07	5.63343e-06	7.41697
Bves	-1.08187	12.6136	-7.56967	9.44757e-07	1.83129e-05	5.76309
Ccdc102a	-1.08208	9.97651	-6.33685	8.66334e-06	0.000102118	3.50857
Eva1b	-1.08274	10.3062	-4.52812	0.000320993	0.00182552	-0.150068
Anxa5	-1.08276	12.4116	-4.77539	0.000191595	0.00120033	0.369562
Tnk2	-1.08363	11.1432	-6.26814	9.86215e-06	0.000113298	3.37675
Invs	-1.08512	8.69936	-11.3722	3.27706e-09	3.58709e-07	11.485
LOC102636896	-1.08527	9.4725	-6.71818	4.26995e-06	5.8383e-05	4.22835
Fam19a3	-1.08598	8.38527	-8.28352	2.87194e-07	7.70376e-06	6.97322
Ermp1	-1.08608	9.62636	-7.8604	5.77111e-07	1.27923e-05	6.26424
Rnpep	-1.08823	10.9453	-7.91975	5.22578e-07	1.18532e-05	6.36512
Abca8a	-1.08922	9.39884	-7.31914	1.4577e-06	2.54497e-05	5.32194
Cd74	-1.08973	13.0066	-3.06027	0.00728985	0.0240983	-3.24442
Ikbip	-1.0899	9.36126	-10.3941	1.21277e-08	8.65554e-07	10.173
Ccnd2	-1.09219	9.4893	-6.00894	1.61727e-05	0.000166901	2.87389
Igf1	-1.09281	9.00389	-4.97827	0.000126023	0.000858215	0.792413
Crym	-1.09391	9.63668	-4.65838	0.000244413	0.00146482	0.124202
Mettl18	-1.09548	9.44823	-10.9331	5.83128e-09	5.20336e-07	10.9082
Pon3	-1.09566	11.2613	-4.84104	0.000167226	0.00107497	0.506783
Trim47	-1.09583	10.8886	-7.61558	8.73366e-07	1.73109e-05	5.843
Gm17821	-1.09712	13.1576	-7.24158	1.67e-06	2.83188e-05	5.18361
Sh3glb2	-1.09899	12.6947	-7.24587	1.65744e-06	2.81794e-05	5.19129
Tsen2	-1.10003	10.6355	-10.228	1.52848e-08	9.92694e-07	9.94025
Sema4a	-1.10126	9.14728	-6.23592	1.04823e-05	0.000119019	3.31474
Isoc2b	-1.10173	10.3539	-5.40136	5.33927e-05	0.000430233	1.66155
Fndc1	-1.10246	9.38862	-6.59016	5.40277e-06	7.05547e-05	3.98892
Josd2	-1.10346	10.5635	-7.04293	2.3744e-06	3.69511e-05	4.82552
Emc9	-1.10515	12.557	-4.62261	0.00026337	0.00156067	0.0489902
Adgre5	-1.10696	12.0579	-6.60179	5.28797e-06	6.93811e-05	4.01077
Wisp2	-1.1073	8.75448	-4.95092	0.000133311	0.000897213	0.735619
Ear2	-1.10786	8.67587	-5.1584	8.72061e-05	0.000638288	1.1647
Thbd	-1.10803	10.8538	-4.35583	0.000461327	0.00243591	-0.51431
Trim32	-1.1089	10.2066	-11.7898	1.925e-09	2.40428e-07	12.016
Rab29	-1.10904	9.85821	-11.4018	3.15417e-09	3.51176e-07	11.5232
Zfp566	-1.10936	10.0828	-8.10413	3.85007e-07	9.67934e-06	6.67555
Fundc1	-1.10958	11.4888	-8.72879	1.41156e-07	4.60684e-06	7.69388
Sdc2	-1.10994	10.1758	-4.87099	0.000157187	0.00102395	0.569263
Ky	-1.11026	8.66246	-5.38402	5.52817e-05	0.000441619	1.62631
Ank1	-1.1109	13.2846	-5.61855	3.46484e-05	0.000306998	2.1001
TC1644160	-1.11124	9.02435	-6.52847	6.05634e-06	7.73694e-05	3.87274
Dpysl3	-1.11147	10.201	-4.6819	0.000232716	0.00140903	0.173594
Htra4	-1.11187	8.63323	-3.50738	0.00281445	0.0109019	-2.31379
Endog	-1.11257	12.4247	-4.35008	0.000466961	0.00245899	-0.526485
Plxnd1	-1.11356	10.5988	-6.48205	6.60192e-06	8.29711e-05	3.78499
Pex26	-1.11375	9.8501	-7.83273	6.04543e-07	1.32671e-05	6.21703
Myl1	-1.11561	16.868	-5.5687	3.82438e-05	0.000330733	1.99993
Fsd2	-1.1158	9.34765	-7.29489	1.52088e-06	2.6247e-05	5.27877
Actr3b	-1.11701	9.97392	-2.70727	0.0152595	0.0447427	-3.95469
Rtp4	-1.11886	9.70309	-5.33961	6.04425e-05	0.000475055	1.53588
Ppdpf	-1.11894	12.8867	-7.66732	7.99621e-07	1.64171e-05	5.9327
Mstn	-1.11944	10.6867	-5.42302	5.11254e-05	0.000416268	1.70553
Gng11	-1.11967	13.27	-4.80127	0.000181583	0.00114906	0.423689
Odc1	-1.12035	9.85768	-4.76665	0.000195103	0.00121683	0.351266
Ctdnep1	-1.12038	12.0609	-7.84485	5.92362e-07	1.30561e-05	6.23772
Pygl	-1.12298	9.75505	-2.6985	0.0155385	0.045397	-3.97195
Rhobtb3	-1.12379	9.10568	-10.5893	9.27177e-09	7.12469e-07	10.4429
Abcd2	-1.12391	8.52808	-10.0889	1.85959e-08	1.12174e-06	9.7428
Ifngr2	-1.12395	12.3403	-5.04682	0.000109499	0.000769097	0.934464
Ctsh	-1.12464	12.1548	-3.74547	0.00169119	0.00714158	-1.81038
Adrb3	-1.12489	8.19887	-3.78084	0.00156799	0.0067056	-1.73536
Mapre2	-1.1268	10.0747	-10.5208	1.01843e-08	7.63199e-07	10.3486
Sparcl1	-1.12838	14.4112	-5.42346	5.10807e-05	0.000416251	1.70642
Gbp4	-1.1301	8.8698	-4.57432	0.000291364	0.00169006	-0.0526636
Itgb6	-1.13049	8.87845	-6.33684	8.66359e-06	0.000102118	3.50854
Vim	-1.13145	12.9482	-4.33998	0.00047703	0.0025027	-0.547881
Enpp4	-1.13264	11.452	-8.09837	3.88672e-07	9.73379e-06	6.66593
Gamt	-1.13288	11.9549	-2.95815	0.00904093	0.0287813	-3.45268
Tmed3	-1.13289	12.6823	-10.6627	8.39032e-09	6.69988e-07	10.5432
Cmbl	-1.13304	13.7554	-7.08756	2.19289e-06	3.46805e-05	4.90644
Hr	-1.13397	11.2012	-3.65459	0.00205415	0.00839764	-2.00293
Pitpna	-1.134	11.9635	-6.49946	6.39155e-06	8.09707e-05	3.81793
Zranb3	-1.1368	9.21794	-4.71148	0.000218812	0.00133983	0.235666
Gpc1	-1.13712	14.2494	-7.51389	1.03979e-06	1.948e-05	5.66561
Ar	-1.13764	9.0928	-6.54138	5.91309e-06	7.60968e-05	3.89709
Cyth4	-1.14216	9.54095	-5.26818	6.98069e-05	0.000535268	1.38998
Fbp2	-1.14242	10.6461	-4.99228	0.000122449	0.00084096	0.821482
Fgfbp1	-1.14317	8.55067	-3.85437	0.00133991	0.00588271	-1.57926
Rab3il1	-1.14607	9.63797	-6.26267	9.96471e-06	0.000114207	3.36623
Nupr1	-1.14626	11.9607	-4.36699	0.000450586	0.00238964	-0.490677
Kcnc1	-1.14632	9.35087	-5.1634	8.63248e-05	0.000633235	1.17498
Angptl6	-1.14633	10.9129	-6.64712	4.86442e-06	6.47394e-05	4.09572
Ccdc69	-1.14762	8.80015	-5.36249	5.77251e-05	0.000457387	1.58249
Klhl17	-1.14764	9.6351	-11.9888	1.50188e-09	2.09019e-07	12.2631
Cd209g	-1.14801	8.4745	-3.96396	0.00106033	0.00484966	-1.34638
Palld	-1.14904	11.4932	-4.93022	0.000139115	0.000928577	0.692576
I830012O16Rik	-1.14904	8.83543	-6.49796	6.40945e-06	8.10921e-05	3.81509
Sac3d1	-1.14911	11.5648	-7.90701	5.33813e-07	1.20519e-05	6.34351
Lgi2	-1.1499	8.57242	-8.07709	4.02536e-07	9.96571e-06	6.63032
Txnl4b	-1.15002	10.7068	-7.53211	1.00769e-06	1.90792e-05	5.6975
Cd28	-1.15074	8.96467	-3.20718	0.00533921	0.0186265	-2.94158
Mri1	-1.15508	11.6358	-8.10503	3.84438e-07	9.67751e-06	6.67705
Naa20	-1.15661	12.4432	-9.0829	8.16142e-08	3.07577e-06	8.24892
Ibtk	-1.15987	11.8695	-6.4319	7.24928e-06	8.90574e-05	3.68983
Cilp	-1.16009	10.2495	-3.72492	0.00176722	0.0074128	-1.85397
Serpinf1	-1.16141	12.1631	-3.57131	0.00245479	0.00974515	-2.17898
Tpra1	-1.16273	9.63838	-10.2736	1.43416e-08	9.50451e-07	10.0044
Heatr5a	-1.16373	10.0952	-9.95059	2.26414e-08	1.27868e-06	9.54443
Gvin1	-1.16379	9.80878	-6.93145	2.89965e-06	4.2996e-05	4.62217
P4ha2	-1.16818	10.9685	-6.75962	3.95874e-06	5.48592e-05	4.30536
Ugp2	-1.16852	13.4643	-5.60044	3.59124e-05	0.000315899	2.06374
Prkcdbp	-1.16898	11.3306	-5.01656	0.000116501	0.000809238	0.871803
Cacng1	-1.16944	12.7946	-5.16135	8.6686e-05	0.000635198	1.17076
Oxct1	-1.16944	14.3418	-3.15934	0.00591013	0.0202165	-3.04057
Cd81	-1.17279	13.5401	-9.2769	6.08275e-08	2.50563e-06	8.54639
Card11	-1.17537	8.39852	-5.63918	3.32645e-05	0.000297629	2.14146
Adamtsl4	-1.17627	10.1629	-3.60622	0.00227814	0.00915781	-2.10523
Dlat	-1.17677	12.1057	-3.99714	0.000987884	0.00456794	-1.27585
St3gal1	-1.17721	10.3277	-9.5909	3.81396e-08	1.84732e-06	9.01821
Myl9	-1.17948	13.8932	-5.25682	7.14285e-05	0.000544702	1.36672
Laptm4b	-1.18083	10.5213	-9.5763	3.89668e-08	1.86085e-06	8.99654
Arrb1	-1.18089	10.3816	-9.47334	4.53643e-08	2.08031e-06	8.84295
Penk	-1.1813	11.1646	-3.56227	0.00250271	0.00989504	-2.19805
Ganc	-1.18135	9.83532	-6.4408	7.12978e-06	8.7922e-05	3.70674
Gm3014	-1.18163	9.21253	-3.19614	0.00546592	0.0189692	-2.96445
Ptpn18	-1.18229	10.3548	-6.34172	8.58443e-06	0.000101492	3.51787
Pdf	-1.18256	11.3846	-7.74262	7.03725e-07	1.48875e-05	6.0626
NAP094517-001	-1.18284	11.1118	-9.3405	5.52907e-08	2.3551e-06	8.64291
Ppm1m	-1.18424	9.62856	-6.87665	3.20089e-06	4.64917e-05	4.52159
Rbp7	-1.18456	10.4745	-3.59765	0.00232028	0.00929814	-2.12334
Extl2	-1.18482	10.1897	-8.16626	3.47682e-07	8.96064e-06	6.77913
Lsm12	-1.18551	11.2192	-8.72362	1.42306e-07	4.63475e-06	7.68565
Ushbp1	-1.18625	10.0686	-7.62549	8.58719e-07	1.71252e-05	5.86019
Neurl2	-1.18733	12.5891	-6.63447	4.97893e-06	6.59928e-05	4.07205
Hspb2	-1.18782	13.8229	-5.93422	1.86829e-05	0.000188512	2.72728
Gfra2	-1.18896	8.98317	-6.46947	6.75853e-06	8.44122e-05	3.76114
Gm9757	-1.19104	12.5102	-3.27177	0.00465369	0.0166494	-2.80739
Cib2	-1.19116	15.4673	-5.1499	8.8727e-05	0.000647232	1.14721
Stxbp4	-1.19183	11.5173	-7.21884	1.73819e-06	2.90953e-05	5.14289
Ntf5	-1.19271	9.2733	-8.04136	4.26996e-07	1.04167e-05	6.57039
Chst1	-1.19442	10.3894	-3.47174	0.00303725	0.0116194	-2.38881
Cfap52	-1.19566	9.27146	-3.8979	0.00122093	0.00544712	-1.48678
Dguok	-1.19714	11.1839	-9.28276	6.02941e-08	2.49951e-06	8.5553
G0s2	-1.19808	10.7065	-3.36974	0.00377661	0.0139317	-2.60288
Ifit3	-1.19864	9.69282	-5.18606	8.24408e-05	0.000610752	1.22157
Pfkm	-1.20074	16.686	-5.77702	2.53698e-05	0.000240421	2.4165
Crhr2	-1.20189	12.2792	-3.68421	0.00192802	0.00798926	-1.94022
5230400M03Rik	-1.20394	9.82895	-3.675	0.00196639	0.00811205	-1.95973
Ppp1r3a	-1.20495	12.0762	-5.63119	3.37934e-05	0.000301066	2.12545
Flt3l	-1.20602	9.37426	-12.9301	4.84776e-10	1.00483e-07	13.3843
Cdk19	-1.20637	9.15324	-5.167	8.56959e-05	0.0006296	1.18238
NAP111644-1	-1.20662	9.13458	-4.64339	0.000252181	0.00150536	0.0926975
Homer1	-1.20823	9.43412	-10.5257	1.01162e-08	7.61017e-07	10.3553
Tmem88	-1.20894	11.5599	-5.49451	4.4322e-05	0.000371748	1.85032
Mkl1	-1.20954	9.67081	-6.58938	5.41057e-06	7.06093e-05	3.98745
Unc45b	-1.20965	10.2141	-6.22252	1.07521e-05	0.000121375	3.2889
Agl	-1.21077	15.1476	-6.89164	3.11542e-06	4.54689e-05	4.54913
Tmem55a	-1.21578	11.4969	-8.90775	1.0682e-07	3.77044e-06	7.97635
Rtkn	-1.21735	11.6813	-14.0116	1.43481e-10	4.90452e-08	14.5814
Ormdl1	-1.2197	10.5722	-7.61909	8.68147e-07	1.72601e-05	5.84909
Zfp467	-1.22049	11.0766	-10.3549	1.28057e-08	8.97508e-07	10.1183
Sar1b	-1.22113	13.8975	-6.4574	6.91228e-06	8.55961e-05	3.73825
Aamdc	-1.222	13.2272	-7.56684	9.49356e-07	1.83504e-05	5.75815
Pagr1a	-1.22225	12.133	-9.38194	5.197e-08	2.26529e-06	8.70554
Abca9	-1.22256	9.45582	-7.20208	1.79027e-06	2.97118e-05	5.11285
Rpa3	-1.22441	10.8362	-10.4668	1.09691e-08	7.97472e-07	10.274
Tinag	-1.22554	8.02055	-7.49414	1.07578e-06	2.00029e-05	5.631
Chac2	-1.22699	10.1982	-9.92501	2.34859e-08	1.31117e-06	9.50751
Cdc34	-1.22758	15.7232	-7.86981	5.68083e-07	1.26642e-05	6.28026
N6amt2	-1.22929	12.5241	-10.0367	2.00243e-08	1.19313e-06	9.66823
Bmper	-1.23383	9.92733	-5.18095	8.33007e-05	0.00061525	1.21107
Adi1	-1.23391	11.1108	-6.25957	1.00233e-05	0.000114744	3.36027
Pstk	-1.23442	12.4538	-4.54845	0.000307598	0.00176635	-0.107205
Nme3	-1.23464	10.9734	-7.17169	1.88896e-06	3.09281e-05	5.05826
Mllt3	-1.23479	10.0724	-7.65275	8.19703e-07	1.66286e-05	5.90748
Gpm6b	-1.23666	9.81153	-7.85458	5.82774e-07	1.28593e-05	6.25431
Gbp2	-1.23691	10.0456	-5.44451	4.89738e-05	0.000402449	1.74912
Styx	-1.23725	9.7931	-6.5338	5.99678e-06	7.69705e-05	3.88279
NAP060545-1	-1.23752	13.5654	-5.18865	8.20082e-05	0.000609401	1.22689
Bhlhe40	-1.23808	10.6367	-5.58513	3.70178e-05	0.000322709	2.03298
Znrd1as	-1.23829	11.2712	-8.98768	9.44316e-08	3.40881e-06	8.10121
Fabp5	-1.23936	10.8945	-3.65186	0.00206618	0.00843264	-2.0087
Gck	-1.24202	8.58812	-3.9154	0.00117613	0.00527649	-1.44959
Cfp	-1.2427	10.8653	-4.13088	0.00074308	0.00361232	-0.991615
Fbln2	-1.24281	12.1554	-8.63204	1.64376e-07	5.12431e-06	7.53946
Sod3	-1.24478	9.99475	-5.58135	3.7296e-05	0.000324739	2.02539
Pomk	-1.24846	9.42702	-10.5274	1.00926e-08	7.61017e-07	10.3577
Crot	-1.25023	10.8959	-7.94836	4.98233e-07	1.14611e-05	6.41361
Pdlim2	-1.25218	10.1409	-10.3304	1.32494e-08	9.15266e-07	10.0841
Cd34	-1.25246	10.9205	-8.03681	4.30223e-07	1.04389e-05	6.56274
Grtp1	-1.25416	9.23409	-8.60256	1.7222e-07	5.30102e-06	7.49218
Sox6os	-1.25538	9.16496	-7.22297	1.72559e-06	2.8959e-05	5.15029
Pgk1	-1.25789	15.7838	-7.6412	8.35999e-07	1.68445e-05	5.88746
Bcl2l12	-1.25794	9.59901	-11.0844	4.77145e-09	4.5572e-07	11.1092
Mcpt4	-1.25918	10.7464	-3.29054	0.00447136	0.0161214	-2.7683
Srpx	-1.25926	10.0335	-5.23225	7.5069e-05	0.000566917	1.31639
Slc16a6	-1.25933	9.60683	-4.75289	0.000200757	0.00124651	0.322461
Cmc2	-1.25979	11.6535	-4.95437	0.00013237	0.00089273	0.742774
Hfe2	-1.26055	13.0776	-5.75441	2.65179e-05	0.000248761	2.37156
Lgi4	-1.26174	9.9791	-5.3853	5.51404e-05	0.000441191	1.62891
Kif3c	-1.26254	9.7833	-4.7601	0.000197771	0.00123111	0.337572
Aebp1	-1.26279	13.7187	-4.03244	0.000916283	0.00429155	-1.20082
Sppl2b	-1.26538	12.4923	-7.43555	1.19043e-06	2.15761e-05	5.52799
Ndufa4l2	-1.26587	11.0627	-6.34527	8.52725e-06	0.000101061	3.52467
Myo1g	-1.26733	9.24761	-6.53059	6.03257e-06	7.72285e-05	3.87674
Prkaa2	-1.26767	12.7867	-9.4496	4.69904e-08	2.10474e-06	8.80736
1700120C14Rik	-1.26837	10.0472	-3.559	0.00252028	0.00994633	-2.20495
Vezf1	-1.26917	12.5641	-7.03845	2.39348e-06	3.71591e-05	4.81738
Irs1	-1.27051	9.7859	-6.64582	4.87603e-06	6.48495e-05	4.09329
Psmb8	-1.27091	10.5991	-8.81696	1.22986e-07	4.13348e-06	7.83356
Atp1b2	-1.27128	11.907	-5.79968	2.42702e-05	0.000232946	2.4615
NAP061301-1	-1.2723	15.4508	-5.59714	3.61476e-05	0.000317252	2.05712
Slc46a3	-1.27375	10.9895	-6.3392	8.62523e-06	0.000101851	3.51305
Fam213b	-1.27376	15.2432	-7.93731	5.07489e-07	1.15919e-05	6.3949
Hspb3	-1.27518	12.939	-5.98817	1.68333e-05	0.000172846	2.83321
Ms4a7	-1.27537	9.39214	-4.52974	0.000319905	0.00182146	-0.146654
Bace1	-1.27577	10.8732	-6.84005	3.42019e-06	4.89273e-05	4.45415
Ddah2	-1.28251	10.9226	-6.08212	1.40519e-05	0.000150433	3.01677
NAP112592-1	-1.28313	16.5182	-6.06856	1.44222e-05	0.000153089	2.99033
Ecm2	-1.28504	8.7758	-9.86805	2.54883e-08	1.39498e-06	9.425
TC1657454	-1.28535	8.88346	-7.02353	2.45812e-06	3.78363e-05	4.79027
Lama4	-1.28929	10.5041	-6.54406	5.88375e-06	7.57693e-05	3.90215
Stmn4	-1.28994	9.74377	-4.40452	0.000416285	0.00224244	-0.411223
Xirp2	-1.2906	11.7519	-5.68239	3.05474e-05	0.000278552	2.22795
Ostn	-1.29089	9.03118	-3.68065	0.00194278	0.00804188	-1.94777
Prss23	-1.29119	11.4167	-6.47894	6.64035e-06	8.32565e-05	3.77908
Phgdh	-1.29949	9.38171	-4.65981	0.000243685	0.00146136	0.127207
Shisa4	-1.30309	13.156	-8.43354	2.25458e-07	6.56941e-06	7.2189
Podn	-1.30629	10.0146	-5.27445	6.8928e-05	0.000529781	1.40281
Vkorc1	-1.30771	10.6268	-11.2534	3.82331e-09	3.96241e-07	11.3309
Fam136a	-1.30995	11.1779	-10.9274	5.87528e-09	5.20336e-07	10.9007
Sigmar1	-1.31032	10.3825	-12.5314	7.76013e-10	1.41307e-07	12.9188
Gstt1	-1.31321	11.5597	-6.21547	1.08968e-05	0.000122582	3.2753
Comtd1	-1.31414	11.2391	-6.94571	2.8262e-06	4.22606e-05	4.64828
Eef1e1	-1.31544	10.236	-13.0494	4.22143e-10	9.45722e-08	13.5208
Ak1	-1.31741	17.0763	-5.18354	8.28639e-05	0.000612954	1.21639
S100a11	-1.31878	10.7898	-7.01638	2.48975e-06	3.82387e-05	4.77725
Sobp	-1.31894	12.1145	-7.74354	7.02633e-07	1.48805e-05	6.06418
Apbb3	-1.32612	10.9603	-7.94549	5.00627e-07	1.14891e-05	6.40874
Tmem18	-1.3277	10.6152	-9.63786	3.56011e-08	1.79564e-06	9.08777
BC064822	-1.32832	11.362	-9.3335	5.58738e-08	2.36149e-06	8.63231
Fgf6	-1.33209	9.65054	-5.49506	4.42739e-05	0.000371504	1.85142
Pdlim7	-1.3344	11.5591	-7.56094	9.59005e-07	1.8436e-05	5.74787
Arhgef6	-1.3353	12.2019	-7.23777	1.68121e-06	2.84347e-05	5.1768
Hs3st5	-1.33594	9.11868	-7.55651	9.6633e-07	1.85132e-05	5.74013
Tgtp2	-1.33615	9.4036	-8.39431	2.40121e-07	6.83992e-06	7.15495
S100a10	-1.33652	11.0684	-5.00368	0.000119618	0.000825297	0.845121
Sema3b	-1.33775	10.5713	-4.58071	0.000287492	0.00167259	-0.0392047
Ccng1	-1.3378	13.702	-5.7359	2.74981e-05	0.000255495	2.3347
Vldlr	-1.33781	11.5622	-4.57046	0.000293732	0.00170026	-0.0608068
Mterf2	-1.34144	10.6305	-5.08575	0.000101123	0.000720659	1.01493
Orai1	-1.34543	9.62956	-12.0343	1.41959e-09	2.06412e-07	12.3192
Ly6e	-1.34701	12.6225	-7.18095	1.85832e-06	3.06324e-05	5.07489
Mamstr	-1.3486	9.36874	-6.93164	2.89862e-06	4.2996e-05	4.62253
Slc2a4rg-ps	-1.35024	9.59568	-14.0703	1.34608e-10	4.82303e-08	14.6438
Xpo1	-1.35423	9.34937	-13.7566	1.89786e-10	5.86952e-08	14.3073
Lrrc17	-1.3557	9.08081	-5.39933	5.36103e-05	0.000431273	1.65743
Adcy7	-1.35584	9.15426	-5.38491	5.51835e-05	0.000441196	1.62812
Rab3a	-1.35899	11.4612	-7.51097	1.04502e-06	1.95592e-05	5.66051
Mboat1	-1.36139	9.10493	-5.41935	5.15029e-05	0.000418466	1.69808
Dhcr24	-1.3614	9.09397	-8.0985	3.88589e-07	9.73379e-06	6.66614
Suv420h2	-1.36442	11.3576	-6.17703	1.17227e-05	0.000129923	3.20102
Antxr2	-1.3681	10.2098	-7.19733	1.80535e-06	2.98603e-05	5.10432
Fcrls	-1.37141	8.63611	-7.03901	2.39108e-06	3.71514e-05	4.8184
NAP111439-1	-1.37148	11.4953	-4.81124	0.000177868	0.00112922	0.444536
NAP111445-1	-1.37154	11.2252	-5.1925	8.137e-05	0.000606045	1.2348
Emilin2	-1.37172	10.9961	-5.511	4.28898e-05	0.000363208	1.88363
Icam2	-1.37177	12.2156	-4.90578	0.000146299	0.000967097	0.641733
Rfxank	-1.37226	9.84335	-11.0609	4.92183e-09	4.65519e-07	11.0781
Pdlim3	-1.37235	15.0326	-5.43775	4.96403e-05	0.000407067	1.73542
H2-Eb1	-1.37416	12.3316	-3.55148	0.00256113	0.0100823	-2.22082
Rtn4	-1.37529	14.3801	-7.59249	9.08542e-07	1.77731e-05	5.80284
0610040J01Rik	-1.37612	10.5157	-5.24494	7.31657e-05	0.000555341	1.34239
Ankrd23	-1.37984	15.3268	-4.12548	0.000751673	0.00364863	-1.00311
Tpi1	-1.3831	16.4595	-7.74502	7.00876e-07	1.48805e-05	6.06672
Sdhaf4	-1.3836	11.5384	-4.98813	0.000123497	0.000847262	0.81287
Stbd1	-1.38991	12.3796	-6.18211	1.16099e-05	0.000129114	3.21085
Trmt12	-1.39041	9.36154	-11.8248	1.8424e-09	2.331e-07	12.0597
Ccdc28b	-1.39096	12.8239	-4.68541	0.000231017	0.00140179	0.180975
Gm4544	-1.39102	9.25709	-6.59743	5.33072e-06	6.98009e-05	4.00258
Myoz3	-1.39342	10.4953	-8.81774	1.22838e-07	4.13348e-06	7.83477
4930430F08Rik	-1.39857	10.3943	-9.25577	6.27938e-08	2.57574e-06	8.51421
Dnajb5	-1.39941	13.0913	-13.2037	3.53473e-10	8.60883e-08	13.6959
Klhl8	-1.40138	11.4861	-6.66706	4.68939e-06	6.2932e-05	4.13301
Dupd1	-1.40151	12.6957	-5.06115	0.000106337	0.000751497	0.964084
Fam118b	-1.40308	11.9447	-9.84313	2.64197e-08	1.43388e-06	9.3888
Tmem119	-1.40338	8.78472	-4.64554	0.000251054	0.00150047	0.0972044
Aqp4	-1.40404	9.2354	-4.11846	0.000762971	0.00369427	-1.01801
Fitm1	-1.40489	14.4826	-5.10897	9.64434e-05	0.000693652	1.06285
Cfb	-1.40519	10.4201	-4.67533	0.000235926	0.00142556	0.159797
1700052K11Rik	-1.40577	9.635	-10.9596	5.6292e-09	5.1252e-07	10.9436
Usp2	-1.40602	13.0085	-4.24587	0.000582153	0.00294615	-0.747451
Stab1	-1.40646	10.2952	-6.37911	8.00227e-06	9.61852e-05	3.5893
Tmem100	-1.41007	9.289	-5.83853	2.24987e-05	0.000218854	2.53847
Metrn	-1.41399	11.6879	-5.74752	2.68787e-05	0.000251297	2.35784
Slc25a19	-1.4191	12.1542	-7.14353	1.98547e-06	3.21303e-05	5.00755
Rprd1a	-1.4228	10.7097	-8.2458	3.05349e-07	8.09444e-06	6.91098
Rhbdl1	-1.4255	9.93356	-7.06604	2.27854e-06	3.57839e-05	4.86746
Amhr2	-1.42557	11.2851	-4.80034	0.000181932	0.0011507	0.421749
Gm6307	-1.43003	8.57219	-7.47614	1.10971e-06	2.0475e-05	5.59941
Ift122	-1.43004	9.95143	-6.48005	6.62656e-06	8.31907e-05	3.7812
Epdr1	-1.43043	13.2817	-4.93052	0.000139027	0.000928305	0.693217
Pea15a	-1.43055	9.47159	-5.37126	5.6717e-05	0.000451235	1.60034
Tfrc	-1.43191	8.98176	-5.58131	3.72988e-05	0.000324739	2.02531
Pcp4l1	-1.43423	11.1382	-5.16348	8.63114e-05	0.000633235	1.17514
Schip1	-1.43641	10.9723	-7.36865	1.33708e-06	2.37049e-05	5.40981
Asb5	-1.4392	13.2067	-7.58083	9.26864e-07	1.8041e-05	5.78253
Fhod1	-1.44056	12.3412	-10.1797	1.63589e-08	1.04162e-06	9.87188
Klhl31	-1.44264	12.6762	-7.51788	1.03266e-06	1.93903e-05	5.6726
Fxyd2	-1.44356	9.899	-7.17838	1.86678e-06	3.07458e-05	5.07027
Emp3	-1.44451	10.2083	-9.10874	7.84619e-08	3.00344e-06	8.28879
Slc38a4	-1.44494	11.2949	-5.02757	0.000113901	0.000794775	0.894619
Pdgfa	-1.44759	12.3238	-7.29366	1.52415e-06	2.62801e-05	5.27659
Gm5860	-1.4491	10.1843	-7.29499	1.52061e-06	2.6247e-05	5.27896
Myf6	-1.45191	13.1545	-5.39622	5.39454e-05	0.000433432	1.65111
Piezo1	-1.46146	11.6756	-4.80616	0.000179752	0.00114044	0.433912
H2-Ab1	-1.46224	12.5333	-3.62668	0.00218058	0.00882008	-2.06198
Carns1	-1.463	10.4975	-7.63572	8.43857e-07	1.69677e-05	5.87795
Tob1	-1.46436	11.4894	-5.81963	2.33431e-05	0.000225776	2.50105
C3	-1.46547	13.467	-3.21826	0.00521494	0.0182814	-2.9186
Naaa	-1.4657	9.8311	-11.5282	2.68147e-09	3.09147e-07	11.6854
Yipf7	-1.47019	12.4084	-6.13523	1.26948e-05	0.000138802	3.12002
H2-DMb1	-1.47522	9.73212	-5.40147	5.33809e-05	0.000430233	1.66177
Sfrp4	-1.48001	9.13058	-3.38323	0.00366936	0.0136015	-2.57461
Sncg	-1.48255	10.4148	-4.57109	0.000293347	0.00169954	-0.0594873
Slc26a6	-1.48433	9.28111	-9.24178	6.41323e-08	2.60657e-06	8.49287
l7Rn6	-1.48901	12.3734	-11.9421	1.59134e-09	2.13832e-07	12.2055
Gmpr	-1.49252	11.5082	-8.5324	1.92513e-07	5.7974e-06	7.37919
Tpm2	-1.49337	15.3879	-4.20153	0.000639548	0.00318532	-0.841572
9630010G10Rik	-1.49398	9.42168	-9.36641	5.31893e-08	2.30811e-06	8.68209
Marcks	-1.49429	11.6036	-5.76328	2.60613e-05	0.000245422	2.38919
Crlf1	-1.49709	8.98846	-11.5867	2.48873e-09	2.92111e-07	11.7598
Aldh1a2	-1.50585	8.74104	-5.57759	3.7575e-05	0.000326253	2.01782
Gm4980	-1.50842	8.79185	-8.08612	3.96594e-07	9.85618e-06	6.64543
Apobec2	-1.51201	12.1751	-8.00536	4.53216e-07	1.07036e-05	6.50984
NAP114295-1	-1.51393	12.6203	-7.43664	1.18818e-06	2.15554e-05	5.52991
Plekhh3	-1.51424	10.3196	-8.3443	2.60282e-07	7.21385e-06	7.07311
Uba7	-1.52143	9.40642	-13.5506	2.38668e-10	6.83854e-08	14.0824
Itgb1bp2	-1.52399	13.0818	-3.67209	0.00197867	0.00815232	-1.96588
Kera	-1.52568	9.80036	-2.65666	0.0169388	0.0487858	-4.05399
Mettl11b	-1.52665	9.2196	-7.09463	2.16549e-06	3.44428e-05	4.91924
Ldha	-1.52674	15.5381	-9.76323	2.96562e-08	1.56168e-06	9.2722
TC1686493	-1.5269	9.40089	-10.0315	2.01723e-08	1.19829e-06	9.66081
2310047D07Rik	-1.53336	9.5972	-12.8895	5.08313e-10	1.01814e-07	13.3374
Clcn1	-1.53393	9.72846	-9.45355	4.67159e-08	2.10474e-06	8.81328
Kcng4	-1.53752	8.85044	-5.70911	2.89832e-05	0.000267002	2.2813
Vwa1	-1.53772	10.4292	-7.7851	6.55005e-07	1.41268e-05	6.13554
6430571L13Rik	-1.53794	9.01713	-12.0164	1.45139e-09	2.07933e-07	12.2971
Lamb1	-1.53957	11.5745	-5.03541	0.000112088	0.000785582	0.910841
2310040G24Rik	-1.54122	12.6231	-4.83823	0.000168201	0.00107981	0.500916
Aif1	-1.54616	9.08752	-6.98497	2.63384e-06	3.99982e-05	4.72
Ak3	-1.5538	11.8405	-8.90516	1.0725e-07	3.77876e-06	7.97228
Tmem107	-1.55704	9.64846	-13.476	2.59527e-10	7.2379e-08	14
Rps6ka1	-1.55777	10.3936	-7.17354	1.88279e-06	3.09051e-05	5.06158
Psmb9	-1.5646	9.66542	-8.31167	2.74384e-07	7.45147e-06	7.01955
Krba1	-1.56699	11.5447	-7.66435	8.03682e-07	1.64485e-05	5.92755
Pfkfb1	-1.57003	12.7475	-4.49796	0.000341977	0.00191798	-0.213726
AW112010	-1.57171	10.5564	-10.7302	7.65667e-09	6.32774e-07	10.6351
Myod1	-1.57347	9.00293	-8.3338	2.64736e-07	7.3048e-06	7.05589
Jak2	-1.57897	11.0068	-7.09037	2.18197e-06	3.462e-05	4.91153
Smtn	-1.58359	12.3925	-11.8983	1.68069e-09	2.22766e-07	12.1512
Oxnad1	-1.58486	11.4005	-8.01685	4.44674e-07	1.05917e-05	6.52917
Nmb	-1.59082	10.9391	-4.75432	0.000200162	0.00124321	0.325454
Scd2	-1.59203	10.8829	-4.15631	0.000703985	0.00345716	-0.937589
Ppm1j	-1.59569	11.5003	-8.72281	1.42487e-07	4.63475e-06	7.68437
Timp4	-1.6022	11.3233	-5.68813	3.02044e-05	0.000275774	2.23941
Pcsk6	-1.60659	9.69679	-4.61206	0.000269244	0.00158968	0.0267867
Phkg1	-1.6091	11.2444	-7.7847	6.55441e-07	1.41268e-05	6.13486
Anxa2	-1.61072	13.4873	-7.1144	2.09074e-06	3.35e-05	4.95498
Scn4b	-1.61114	14.315	-7.08639	2.19744e-06	3.47242e-05	4.90434
Cd24a	-1.628	13.5446	-4.32888	0.000488357	0.00254961	-0.571412
Crip1	-1.62862	14.8479	-10.307	1.3687e-08	9.29193e-07	10.0514
Synm	-1.63424	12.0821	-8.11263	3.79663e-07	9.60695e-06	6.68975
Gm40442	-1.63492	10.0359	-4.33832	0.000478712	0.00251002	-0.55141
Fbn1	-1.63894	9.99312	-4.47567	0.000358375	0.00199234	-0.260791
Cacng6	-1.64011	11.0706	-10.2916	1.39855e-08	9.42885e-07	10.0297
Bst2	-1.64334	11.1249	-8.40853	2.34695e-07	6.7545e-06	7.17815
Cav3	-1.64444	13.622	-6.98256	2.64525e-06	4.00777e-05	4.71561
Rcn1	-1.64508	10.628	-7.57647	9.33808e-07	1.81218e-05	5.77494
Calm2	-1.65448	14.7224	-9.96291	2.2246e-08	1.27109e-06	9.56219
Fzd9	-1.65455	10.688	-4.45905	0.00037112	0.00204642	-0.2959
Mfap5	-1.66072	12.0184	-5.33024	6.15932e-05	0.000482485	1.51677
Igtp	-1.66547	11.1842	-4.88931	0.000151355	0.00099427	0.607426
Nexn	-1.66633	12.9797	-8.95636	9.90967e-08	3.54926e-06	8.05237
Pcdh12	-1.66985	9.43046	-6.05655	1.47583e-05	0.000155483	2.96691
D1Ertd622e	-1.68509	10.3701	-7.13201	2.02644e-06	3.26577e-05	4.98677
Tubd1	-1.69105	9.68727	-17.5134	4.5499e-12	6.33215e-09	17.903
Fam73b	-1.69784	11.1866	-6.64907	4.84695e-06	6.45951e-05	4.09938
Dapk2	-1.70131	10.2991	-8.91127	1.06241e-07	3.7568e-06	7.98186
Srpk3	-1.70172	11.8268	-4.86208	0.000160109	0.00103778	0.550673
Tmsb10	-1.70651	12.0706	-7.79337	6.45934e-07	1.39527e-05	6.14971
Rbfox1	-1.70894	13.7022	-9.34501	5.49187e-08	2.34868e-06	8.64974
Ces1d	-1.71208	10.907	-5.64485	3.28944e-05	0.000294673	2.15282
Hmga2-ps1	-1.71906	9.23144	-4.16053	0.000697711	0.00343722	-0.928637
Paqr7	-1.72118	9.76624	-13.263	3.30321e-10	8.25124e-08	13.7626
Ptx4	-1.7248	9.39535	-3.24842	0.00489093	0.0173453	-2.85598
Parp3	-1.72797	10.0867	-11.6918	2.17793e-09	2.60336e-07	11.8929
Nudt4	-1.72814	13.3394	-8.13377	3.66704e-07	9.32054e-06	6.72502
Fbln7	-1.72904	9.8127	-5.64968	3.25819e-05	0.000292403	2.16251
Emid1	-1.73036	9.84638	-6.04096	1.52068e-05	0.000159381	2.93649
Ldb3	-1.73441	14.2662	-5.2227	7.65352e-05	0.000575757	1.29681
Gpcpd1	-1.74282	10.3441	-6.42389	7.35857e-06	9.01159e-05	3.67461
Rasd2	-1.75346	10.7834	-2.94443	0.00930554	0.0294668	-3.48052
Rs5-8s1	-1.75506	12.5475	-3.29463	0.00443261	0.0160054	-2.75979
Cyp2f2	-1.75583	9.64863	-4.78784	0.000186707	0.00117348	0.39562
Ufsp1	-1.75785	11.4091	-5.70584	2.91705e-05	0.000268219	2.27477
Efemp2	-1.76272	10.882	-10.5068	1.03812e-08	7.69074e-07	10.3294
Hist2h3c2	-1.76544	10.6336	-7.39094	1.28623e-06	2.29443e-05	5.44925
Dok2	-1.76973	9.73741	-6.80584	3.63924e-06	5.12864e-05	4.39098
Tmem25	-1.77421	10.3652	-8.03859	4.28956e-07	1.04212e-05	6.56574
Xrcc5	-1.77476	11.4207	-8.01177	4.4843e-07	1.06509e-05	6.52063
Mum1l1	-1.78117	9.16767	-13.3552	2.97462e-10	7.52695e-08	13.8658
Vegfa	-1.78181	11.1073	-14.31	1.03992e-10	3.99301e-08	14.8959
Folr2	-1.79526	10.5898	-5.58075	3.73402e-05	0.000324752	2.02418
Itm2a	-1.79844	13.6317	-4.49406	0.000344789	0.00192931	-0.221956
Tigar	-1.79964	11.159	-15.1585	4.29352e-11	2.29824e-08	15.7558
Asb2	-1.80059	13.5618	-6.47466	6.69348e-06	8.38687e-05	3.77097
Hspa12b	-1.80146	10.1882	-9.32832	5.6309e-08	2.37434e-06	8.62446
Acvrl1	-1.81063	10.6256	-14.7301	6.67362e-11	2.9552e-08	15.328
Arhgap20	-1.81686	10.8786	-9.03552	8.77477e-08	3.24565e-06	8.17555
Tmem109	-1.82236	14.7218	-9.10922	7.84038e-08	3.00344e-06	8.28954
Pfn2	-1.82588	13.5624	-8.94953	1.00146e-07	3.58026e-06	8.04171
Fn1	-1.82722	12.7178	-4.4553	0.000374063	0.00206127	-0.303834
Lsp1	-1.83547	13.4564	-4.45898	0.00037118	0.00204642	-0.296062
Pla2g7	-1.83637	10.2985	-5.02745	0.00011393	0.000794775	0.894364
Islr	-1.83802	10.6057	-8.05215	4.19449e-07	1.02966e-05	6.58851
Col5a1	-1.83856	9.92696	-5.09815	9.85962e-05	0.000706675	1.04052
Mtfp1	-1.84092	13.9044	-4.27278	0.000549894	0.00280181	-0.690354
Arhgef10l	-1.8416	11.8149	-9.51022	4.29543e-08	2.0022e-06	8.89811
Camk2a	-1.84717	9.5422	-10.4327	1.14978e-08	8.32798e-07	10.2267
Jph2	-1.85511	10.2318	-6.62601	5.05705e-06	6.67103e-05	4.0562
Il4i1	-1.85604	9.4873	-5.02657	0.000114135	0.000795639	0.892543
Dcun1d2	-1.85735	12.5762	-8.43656	2.24366e-07	6.56941e-06	7.22382
Lingo3	-1.8599	9.76955	-7.42759	1.20696e-06	2.1828e-05	5.51396
Asb14	-1.86078	12.6874	-10.1505	1.70445e-08	1.06441e-06	9.83054
Sdpr	-1.86256	13.4817	-8.83713	1.19186e-07	4.05273e-06	7.86536
Pdp1	-1.86348	11.4396	-7.86056	5.76961e-07	1.27923e-05	6.2645
2310016D23Rik	-1.86766	10.1123	-3.96711	0.00105324	0.00482504	-1.3397
Lyl1	-1.86849	9.92476	-10.0753	1.89561e-08	1.13994e-06	9.72347
2410127L17Rik	-1.87175	13.4693	-9.42805	4.85201e-08	2.15345e-06	8.77498
Tuba1a	-1.88208	11.6107	-7.2172	1.74322e-06	2.91544e-05	5.13995
Lsmem1	-1.88816	9.97189	-15.4929	3.06564e-11	1.89024e-08	16.0814
Rbp4	-1.89947	10.093	-3.23184	0.00506651	0.017851	-2.89042
Gm13315	-1.90031	10.6857	-7.39417	1.27903e-06	2.2863e-05	5.45496
Mat2a	-1.90213	12.4832	-10.5406	9.91093e-09	7.51379e-07	10.3759
Tbc1d10c	-1.90972	9.47856	-8.06499	4.1065e-07	1.01152e-05	6.61005
Neu2	-1.91217	11.8031	-5.56272	3.87002e-05	0.000334065	1.98789
Serpinh1	-1.92551	11.0994	-4.79418	0.00018427	0.00116041	0.408869
Gpd1	-1.92708	15.861	-7.55951	9.61361e-07	1.84543e-05	5.74537
Prkag3	-1.92967	11.0881	-7.16716	1.90417e-06	3.11248e-05	5.0501
8430426J06Rik	-1.93543	9.91623	-5.01493	0.000116891	0.000810499	0.86843
Cd209d	-1.93583	9.76474	-3.84655	0.00136249	0.00595885	-1.59586
Phka1	-1.93622	14.6938	-6.93755	2.86799e-06	4.2689e-05	4.63334
Myoc	-1.93815	10.9234	-6.09058	1.3826e-05	0.000148504	3.03324
Dhrs7c	-1.94653	14.5975	-8.82191	1.22041e-07	4.12105e-06	7.84137
LOC102634333	-1.9481	11.0399	-9.67364	3.37865e-08	1.72781e-06	9.14059
Pomgnt2	-1.95707	11.8286	-10.2493	1.48363e-08	9.79901e-07	9.97023
Pgam2	-1.96179	16.9701	-6.68012	4.57829e-06	6.17477e-05	4.1574
F830016B08Rik	-1.96321	9.85537	-6.54547	5.86839e-06	7.56215e-05	3.90481
Ccnd1	-1.9633	9.60336	-7.56213	9.57064e-07	1.84263e-05	5.74993
S100a4	-1.96397	11.8835	-5.85773	2.1673e-05	0.000212199	2.57646
Fap	-1.97129	11.58	-7.19123	1.82487e-06	3.01576e-05	5.09337
Acp5	-1.97626	10.9885	-3.22062	0.00518882	0.0182128	-2.9137
Cdc42ep2	-1.98774	11.5935	-9.01072	9.11486e-08	3.31951e-06	8.13705
Alg2	-1.98906	10.3382	-12.4723	8.32918e-10	1.45154e-07	12.8487
Parm1	-1.99107	11.6844	-12.9591	4.68722e-10	9.92672e-08	13.4175
Otub2	-1.99271	10.6114	-6.4917	6.4845e-06	8.18004e-05	3.80324
Maf	-1.99696	11.1344	-11.3438	3.39965e-09	3.65583e-07	11.4483
Prr33	-2.00285	12.8695	-6.95365	2.78614e-06	4.17899e-05	4.6628
Fstl1	-2.00376	12.0759	-5.58037	3.73689e-05	0.000324752	2.0234
AI464131	-2.00669	11.3349	-14.6781	7.04607e-11	3.05079e-08	15.2752
Aurka	-2.00873	9.92	-8.04082	4.27375e-07	1.04167e-05	6.56949
Clec3b	-2.02882	10.0518	-11.201	4.09401e-09	4.07777e-07	11.2625
Sema6c	-2.03127	11.1988	-9.97718	2.17972e-08	1.25525e-06	9.58274
Gm16062	-2.04136	10.2565	-8.76269	1.33858e-07	4.41672e-06	7.74769
Bpgm	-2.0508	12.4682	-9.35235	5.43194e-08	2.33119e-06	8.66084
Pgm2	-2.0514	16.7396	-9.20014	6.82953e-08	2.7212e-06	8.42924
Atp1b1	-2.05194	11.6214	-4.51402	0.000330631	0.00186887	-0.17981
A430046D13Rik	-2.05458	10.1193	-14.7594	6.47323e-11	2.93313e-08	15.3576
Cd55	-2.05733	11.5756	-10.3254	1.3341e-08	9.15266e-07	10.0771
Ly6g6e	-2.06992	8.76426	-5.1546	8.78844e-05	0.000642047	1.15686
Ppp1r3c	-2.07231	13.2061	-6.65871	4.76181e-06	6.36782e-05	4.11741
Sfrp2	-2.09377	9.08318	-4.58929	0.000282374	0.00164921	-0.0211314
Ptges3l	-2.10706	13.3137	-8.34584	2.59635e-07	7.21385e-06	7.07564
Col1a2	-2.10715	14.9281	-3.8206	0.00144019	0.00623571	-1.65096
Rxrg	-2.10767	12.4725	-9.56454	3.96468e-08	1.87951e-06	8.97906
Retn	-2.11962	11.3981	-2.75766	0.0137465	0.0409474	-3.85509
Kctd15	-2.12678	13.5963	-11.0369	5.08035e-09	4.75892e-07	11.0464
Sypl2	-2.13001	10.9724	-8.01109	4.48934e-07	1.06509e-05	6.51948
Ppapdc3	-2.14176	13.6342	-8.59399	1.74572e-07	5.36493e-06	7.47842
Itga11	-2.14437	10.8672	-8.12168	3.74056e-07	9.47739e-06	6.70486
Kcnj12	-2.14692	10.7437	-7.38236	1.30555e-06	2.32093e-05	5.43408
Calm1	-2.15706	13.7292	-12.9322	4.8363e-10	1.00483e-07	13.3866
Gm13304	-2.16742	12.673	-6.56845	5.62398e-06	7.30031e-05	3.94809
Nctc1	-2.1766	13.6421	-6.44425	7.08397e-06	8.74124e-05	3.71329
Hrasls	-2.17733	11.9672	-8.5207	1.96134e-07	5.8588e-06	7.36028
Ccl24	-2.17879	9.61087	-6.42003	7.41182e-06	9.0711e-05	3.66727
Nr4a1	-2.2069	14.852	-4.78069	0.000189497	0.0011891	0.380663
Asb10	-2.2137	12.5638	-12.4488	8.56738e-10	1.45154e-07	12.8207
Slc16a3	-2.22103	14.6266	-4.66448	0.000241322	0.00144987	0.13702
Lum	-2.22526	12.3265	-5.69566	2.97603e-05	0.000272358	2.25445
Perm1	-2.23602	12.3592	-4.55135	0.000305734	0.00175668	-0.101091
Lmod3	-2.24821	13.7223	-7.24034	1.67364e-06	2.83559e-05	5.18139
Gm1987	-2.24929	12.552	-6.34266	8.56918e-06	0.000101435	3.51968
A830052D11Rik	-2.29291	10.7176	-9.0011	9.25049e-08	3.35636e-06	8.12209
Grem2	-2.29757	9.3186	-4.82042	0.000174518	0.00111158	0.463717
Fam131a	-2.30793	12.9773	-7.92144	5.21104e-07	1.18335e-05	6.368
Golm1	-2.32141	11.0772	-8.9123	1.06071e-07	3.7568e-06	7.98348
Mkks	-2.32408	10.8107	-9.20942	6.7344e-08	2.69986e-06	8.44343
LOC102643247	-2.34138	11.6947	-8.33543	2.64037e-07	7.29717e-06	7.05857
Map2k6	-2.34297	11.2133	-5.60159	3.58303e-05	0.00031551	2.06606
Dnmt3a	-2.35659	10.7183	-9.42029	4.90831e-08	2.16856e-06	8.76332
Ccrn4l	-2.36024	11.3312	-5.63137	3.37817e-05	0.000301066	2.1258
Gdf1	-2.38167	10.1338	-15.3513	3.53304e-11	2.02464e-08	15.9444
Smco1	-2.39899	11.3327	-7.13306	2.02266e-06	3.26238e-05	4.98867
Pde4a	-2.40205	10.8904	-12.5902	7.23383e-10	1.34232e-07	12.9884
Abra	-2.42299	11.4151	-8.19832	3.29922e-07	8.59106e-06	6.83238
Adipoq	-2.42638	11.3193	-3.18169	0.00563629	0.0194289	-2.99436
Ddit4l	-2.43825	12.9826	-6.28219	9.60368e-06	0.000111049	3.40376
Tmod4	-2.43923	16.1839	-7.93565	5.08903e-07	1.16106e-05	6.39207
Shisa2	-2.44084	11.6284	-10.3102	1.36276e-08	9.28392e-07	10.0557
5430431A17Rik	-2.44783	11.1333	-7.40986	1.24465e-06	2.23509e-05	5.48268
Ogn	-2.47308	12.045	-10.9357	5.81123e-09	5.20336e-07	10.9117
Hacd1	-2.47629	13.6456	-6.54721	5.84955e-06	7.54286e-05	3.90808
Pkdcc	-2.48907	13.6136	-10.8803	6.25709e-09	5.46696e-07	10.8376
AK033778	-2.49103	10.5108	-5.94329	1.83579e-05	0.000185714	2.74511
Dkk3	-2.50054	9.99763	-3.02087	0.0079222	0.025769	-3.32501
Wfdc1	-2.5345	12.2406	-9.24199	6.41116e-08	2.60657e-06	8.4932
LOC102637409	-2.53762	10.0525	-7.68702	7.73291e-07	1.60115e-05	5.96675
Bcl6	-2.5381	12.9774	-8.46025	2.16011e-07	6.3769e-06	7.26234
Pf4	-2.56261	12.1331	-8.3244	2.68788e-07	7.37615e-06	7.04047
Itpr1	-2.5758	11.3949	-7.13701	2.00856e-06	3.24232e-05	4.99579
Ifi27l2a	-2.5896	13.4709	-5.49558	4.42273e-05	0.000371273	1.85249
Aimp2	-2.59728	15.1	-7.7143	7.38295e-07	1.54511e-05	6.01384
Cbr2	-2.61744	12.2689	-8.69765	1.4823e-07	4.76184e-06	7.6443
Retnla	-2.62134	12.2538	-4.80151	0.00018149	0.00114884	0.424206
1700001O22Rik	-2.62572	9.59163	-4.33348	0.000483632	0.00253037	-0.561664
Lrrc38	-2.63786	10.5929	-8.81587	1.23195e-07	4.13348e-06	7.83183
St8sia5	-2.64735	11.3563	-11.9802	1.518e-09	2.09764e-07	12.2525
Ampd1	-2.65003	14.7949	-7.11794	2.07763e-06	3.33723e-05	4.96139
Gm4841	-2.66976	10.3518	-4.19874	0.000643339	0.00320092	-0.847485
Mlf1	-2.68871	12.5495	-7.69932	7.57307e-07	1.57475e-05	5.98799
Gdap1	-2.6975	9.75358	-6.91545	2.98444e-06	4.39855e-05	4.59284
2310065F04Rik	-2.72317	9.84532	-6.12279	1.3e-05	0.000141583	3.09587
B3galnt2	-2.72327	12.2614	-13.3772	2.90132e-10	7.43806e-08	13.8904
Rcn3	-2.74919	11.9237	-10.0223	2.04399e-08	1.20249e-06	9.64753
Pi16	-2.82807	13.1787	-6.84897	3.36535e-06	4.82491e-05	4.4706
Mylk4	-2.8457	10.2059	-6.31955	8.95016e-06	0.000104988	3.47544
Pcolce	-2.85633	13.727	-9.58628	3.83989e-08	1.84732e-06	9.01137
Col6a1	-2.88386	12.4371	-7.97448	4.77051e-07	1.11336e-05	6.45776
Col5a3	-2.89937	11.1965	-6.37755	8.02576e-06	9.636e-05	3.58632
Mss51	-2.90305	12.1315	-4.35736	0.000459835	0.00242939	-0.51106
Col1a1	-2.91466	12.0293	-4.97746	0.000126232	0.000859066	0.790739
Thy1	-2.9666	11.5999	-8.84473	1.17785e-07	4.03325e-06	7.87734
Nrep	-2.9983	10.9748	-6.39415	7.77974e-06	9.41493e-05	3.61799
Casq1	-3.02312	14.1256	-7.54863	9.79495e-07	1.87201e-05	5.72636
BC023105	-3.05105	11.061	-8.17247	3.44162e-07	8.90525e-06	6.78946
Col6a2	-3.08637	10.61	-7.99356	4.62178e-07	1.08908e-05	6.48994
Neat1	-3.22177	14.7316	-11.1124	4.59829e-09	4.41346e-07	11.1462
Tmem233	-3.30602	11.1247	-13.4742	2.60035e-10	7.2379e-08	13.9981
Cd209f	-3.32573	10.2975	-6.9175	2.97343e-06	4.38896e-05	4.5966
Mybph	-3.34147	13.6018	-4.45145	0.000377104	0.00207322	-0.311968
Cd248	-3.51438	11.7557	-10.2094	1.56904e-08	1.01229e-06	9.91389
NAP111447-1	-3.54843	12.398	-7.35548	1.36813e-06	2.41673e-05	5.38646
Dbp	-3.59516	13.6564	-8.3387	2.62645e-07	7.26899e-06	7.06394
Car3	-3.70445	14.4118	-9.1695	7.154e-08	2.81025e-06	8.38227
Plcd4	-3.72959	12.1375	-21.5893	1.6678e-13	8.12387e-10	20.9518
Col6a3	-3.77965	11.7546	-9.77254	2.92584e-08	1.54911e-06	9.28583
Amd2	-3.83095	13.004	-8.24468	3.05904e-07	8.09815e-06	6.90914
Smtnl2	-4.02806	13.5194	-13.4608	2.63997e-10	7.24467e-08	13.9832
Igfbp5	-4.18985	13.0541	-16.4453	1.21535e-11	1.02192e-08	16.9697
Cited4	-4.24189	11.4396	-11.8269	1.83758e-09	2.331e-07	12.0623
Mettl21c	-4.33659	12.3111	-9.60368	3.74305e-08	1.83702e-06	9.03717
Col3a1	-4.37349	13.3783	-7.91426	5.27388e-07	1.19484e-05	6.35581
Smox	-4.6879	13.0303	-9.13011	7.59506e-08	2.93034e-06	8.32172
Nmrk2	-7.25175	13.9293	-12.1864	1.17756e-09	1.82741e-07	12.505

## Sheet: upregulated
gene	logFC	AveExpr	t	P.Value	adj.P.Val	B	FC
Lcn2	4.53177	9.509	11.9554	1.56545e-09	2.11814e-07	12.2219	23.1312
Sesn1	4.06394	11.3602	7.04658	2.35897e-06	3.67697e-05	4.83216	16.7251
Serpina3n	3.9086	8.75183	13.0574	4.18232e-10	9.45722e-08	13.53	15.0178
Mt2	3.90155	13.4284	5.45448	4.80073e-05	0.000396513	1.76933	14.9446
Slc25a34	3.786	10.834	7.6185	8.69028e-07	1.72601e-05	5.84806	13.7943
Ppp1r15a	3.71096	11.7335	11.755	2.01119e-09	2.47333e-07	11.9723	13.0952
Apod	3.54759	12.1827	15.8004	2.26174e-11	1.51147e-08	16.3743	11.6931
8430408G22Rik	3.53482	10.5492	6.64989	4.83971e-06	6.45869e-05	4.1009	11.5901
Ankrd2	3.47132	13.3539	4.36308	0.00045432	0.00240608	-0.498957	11.091
Sln	3.45935	10.9524	3.6513	0.00206865	0.00844095	-2.00988	10.9994
Doc2b	3.22338	8.21356	14.8115	6.13242e-11	2.84486e-08	15.4101	9.33971
Aspg	3.19078	8.54764	16.8578	8.26093e-12	8.0478e-09	17.3378	9.13102
2410006H16Rik	3.16374	11.5578	13.0294	4.31992e-10	9.45722e-08	13.4981	8.96152
Ampd3	3.14438	8.42678	21.7161	1.51925e-13	8.12387e-10	21.0355	8.84204
E130012A19Rik	3.1116	8.91952	12.4216	8.85176e-10	1.48679e-07	12.7883	8.64338
Cidea	3.10421	9.89884	4.68092	0.00023319	0.00141115	0.171546	8.59925
Saa3	3.10125	8.02943	8.26295	2.9695e-07	7.91487e-06	6.9393	8.58164
Mafk	3.04527	9.90273	17.3067	5.47923e-12	6.89127e-09	17.7273	8.25503
Mocs1	3.02502	10.5317	20.1323	5.06099e-13	1.64347e-09	19.9456	8.13995
Gm9465	2.91271	8.41621	15.0267	4.91189e-11	2.39258e-08	15.6255	7.53032
D230025D16Rik	2.90232	10.4431	16.4853	1.1702e-11	1.02192e-08	17.0059	7.47628
Cry2	2.88785	11.6472	10.5115	1.03149e-08	7.67254e-07	10.3358	7.40167
Slc39a14	2.84298	8.98685	15.1424	4.36435e-11	2.29824e-08	15.74	7.17499
Snhg1	2.80609	9.31027	17.271	5.65902e-12	6.89127e-09	17.6968	6.99388
Tgif1	2.80261	10.386	7.95549	4.92359e-07	1.13528e-05	6.42566	6.97701
Hspb7	2.79531	11.0768	4.93404	0.000138023	0.000923189	0.700531	6.94179
Il6ra	2.78359	10.4314	12.3803	9.3036e-10	1.51059e-07	12.7389	6.88565
Acot1	2.77609	8.52553	11.1995	4.10205e-09	4.07777e-07	11.2605	6.84994
Sphk1	2.77078	8.95132	7.36163	1.35354e-06	2.39532e-05	5.39736	6.82478
Maff	2.77064	8.68063	11.8346	1.81992e-09	2.331e-07	12.0719	6.8241
Tmem140	2.75574	13.1234	7.45528	1.15045e-06	2.10078e-05	5.56274	6.75397
Slc43a1	2.7474	10.8972	10.0966	1.83941e-08	1.11301e-06	9.75379	6.71507
Csrnp1	2.64241	10.0573	7.04072	2.38379e-06	3.70677e-05	4.82151	6.24374
Acot2	2.63414	8.62964	13.4016	2.82217e-10	7.43071e-08	13.9176	6.20805
Tmem82	2.63219	8.06571	15.9883	1.88299e-11	1.41108e-08	16.5504	6.19968
Gm38485	2.63138	8.02677	24.3267	2.47516e-14	3.5944e-10	22.6329	6.19619
Fam134b	2.63053	12.0223	12.4515	8.53947e-10	1.45154e-07	12.8239	6.19254
Map3k6	2.6233	10.3433	8.31475	2.73017e-07	7.44227e-06	7.02462	6.16156
Mir22hg	2.62219	9.76158	9.17801	7.06227e-08	2.7911e-06	8.39533	6.15685
Lgals4	2.58041	9.75918	11.2624	3.77851e-09	3.95809e-07	11.3427	5.98109
Slc10a6	2.58003	8.86638	13.0008	4.46572e-10	9.66778e-08	13.4653	5.97952
Snhg12	2.57092	9.02148	15.4043	3.34972e-11	1.97776e-08	15.9958	5.94186
Cirbp	2.55669	12.0868	9.97002	2.2021e-08	1.26193e-06	9.57244	5.88357
Fam214a	2.54377	11.1354	12.3138	1.00836e-09	1.6104e-07	12.659	5.83109
Pim3	2.53085	11.2642	9.19575	6.87503e-08	2.73374e-06	8.42252	5.77912
Gabarapl1	2.52228	14.5939	12.4913	8.14141e-10	1.45154e-07	12.8713	5.74489
Mt1	2.49534	11.5918	5.2003	8.00922e-05	0.000597899	1.25082	5.63862
Plin5	2.49285	12.0655	5.67119	3.12293e-05	0.000283273	2.20554	5.62888
1500012F01Rik	2.4843	12.225	12.1282	1.26455e-09	1.91282e-07	12.4342	5.59562
Napb	2.47716	10.2488	5.86781	2.12521e-05	0.000208703	2.59637	5.568
AK149472	2.45963	10.5845	10.7706	7.24978e-09	6.03653e-07	10.6899	5.50077
TC1616199	2.39169	12.1132	10.7294	7.66448e-09	6.32774e-07	10.6341	5.24771
Cdkn1a	2.38595	8.93992	13.4246	2.74985e-10	7.43071e-08	13.9431	5.22689
Itpkc	2.3791	9.03154	8.31331	2.73657e-07	7.44682e-06	7.02224	5.20211
Trp53inp1	2.36586	9.5863	12.6828	6.48144e-10	1.23689e-07	13.0971	5.15461
Pnrc1	2.36345	11.7134	10.8193	6.79002e-09	5.80249e-07	10.7556	5.14601
Zkscan6	2.35391	8.91937	17.9098	3.2033e-12	4.80101e-09	18.2336	5.11209
Zwint	2.33179	11.5625	15.8931	2.06583e-11	1.43752e-08	16.4614	5.03429
Arid5a	2.3173	10.4033	9.43639	4.79216e-08	2.13662e-06	8.78753	4.98399
BC057675	2.30057	10.9525	11.3403	3.41491e-09	3.65583e-07	11.4438	4.92652
AK132033	2.27173	12.2725	8.25886	2.98928e-07	7.9567e-06	6.93256	4.82902
Tcp11l2	2.2599	11.0016	12.0731	1.35322e-09	1.99271e-07	12.3668	4.78957
Dedd2	2.25074	10.9112	12.4948	8.1072e-10	1.45154e-07	12.8754	4.75926
Mustn1	2.23096	11.9016	5.77353	2.55433e-05	0.000241595	2.40958	4.69448
AK144717	2.22276	10.0692	7.94969	4.97134e-07	1.14494e-05	6.41585	4.66785
3930401B19Rik	2.22236	11.8268	7.49808	1.0685e-06	1.9903e-05	5.63791	4.66656
Nrtn	2.1781	11.6891	10.1059	1.81537e-08	1.10817e-06	9.76704	4.52558
Lrrc58	2.16849	11.2173	13.138	3.81126e-10	9.05592e-08	13.6217	4.49552
Tuba1c	2.16562	11.4342	13.0454	4.24077e-10	9.45722e-08	13.5163	4.4866
Opn1mw	2.15019	8.87244	3.26683	0.00470298	0.0167949	-2.81769	4.43886
Spsb2	2.14739	9.56457	5.9595	1.77912e-05	0.000181128	2.77697	4.43027
Hmgb2	2.14082	9.93202	9.46046	4.6239e-08	2.10005e-06	8.82365	4.41014
Naa25	2.13942	10.2129	9.93368	2.31959e-08	1.29913e-06	9.52003	4.40584
Trim63	2.11204	13.8805	9.68241	3.33566e-08	1.71031e-06	9.15352	4.32302
Egln3	2.1119	9.48542	5.52791	4.14708e-05	0.000353773	1.91775	4.32261
Gnmt	2.10769	8.49413	8.89986	1.08133e-07	3.80299e-06	7.96398	4.30999
Ctsl	2.10057	13.9796	23.7281	3.6896e-14	3.5944e-10	22.2865	4.2888
Nol3	2.08748	10.26	7.21975	1.7354e-06	2.90735e-05	5.14453	4.25006
Clpx	2.07693	11.8637	19.8955	6.1041e-13	1.69903e-09	19.7739	4.2191
LOC102641377	2.06769	9.30009	7.61633	8.7225e-07	1.73064e-05	5.8443	4.19215
Btg2	2.06216	9.95609	4.28162	0.000539695	0.00276068	-0.671598	4.17611
Runx1	2.0561	8.1988	16.675	9.79165e-12	9.08478e-09	17.1759	4.15859
Ddi2	2.05498	10.0545	10.1681	1.6628e-08	1.04848e-06	9.85545	4.15537
Tbc1d15	2.05313	10.1928	16.9191	7.80645e-12	8.0478e-09	17.3916	4.15006
Tacc2	2.05248	14.6274	7.42268	1.21727e-06	2.19402e-05	5.5053	4.14818
Arntl	2.03191	10.0101	4.80419	0.000180486	0.00114363	0.4298	4.08947
Ubap1	2.01511	11.0422	11.7567	2.00679e-09	2.47333e-07	11.9745	4.04213
Acss1	2.01169	11.8413	6.24789	1.02472e-05	0.000116895	3.3378	4.03256
Saa1	1.99311	8.50932	4.50375	0.000337844	0.00190028	-0.201505	3.98095
Eif4ebp1	1.96782	14.0031	8.49362	2.04789e-07	6.0825e-06	7.31647	3.91177
Ube4b	1.96753	10.1328	12.9118	4.95244e-10	1.00514e-07	13.3632	3.91097
Inhbb	1.96633	8.70869	13.9481	1.53766e-10	5.08301e-08	14.5136	3.90774
Pdk4	1.95819	13.8943	3.69633	0.00187867	0.00781539	-1.91455	3.88575
Zfand2a	1.9557	10.192	20.6963	3.26495e-13	1.27229e-09	20.3452	3.87903
Sidt2	1.9541	11.2343	16.4082	1.25878e-11	1.02192e-08	16.9362	3.87474
Arl4d	1.94797	9.69598	7.39264	1.28243e-06	2.29027e-05	5.45226	3.85832
Smtnl1	1.94616	11.9118	2.77401	0.0132876	0.0397749	-3.82264	3.85349
Slc7a1	1.9306	9.39051	10.1313	1.75134e-08	1.08327e-06	9.80321	3.81213
Gadd45a	1.91184	9.44176	8.96813	9.73155e-08	3.49833e-06	8.07075	3.76288
Fam214b	1.91013	11.1667	11.0393	5.064e-09	4.75892e-07	11.0496	3.75842
Map1lc3b	1.90804	13.4605	7.78349	6.56785e-07	1.41313e-05	6.13278	3.75298
Nploc4	1.9043	11.8216	7.60377	8.91184e-07	1.75385e-05	5.82246	3.74328
Gramd1b	1.89672	8.79748	7.06754	2.27247e-06	3.57512e-05	4.87017	3.72366
Gucd1	1.89416	12.0972	16.266	1.44131e-11	1.1233e-08	16.8067	3.71705
Bnip3l	1.88907	11.8695	14.0598	1.36146e-10	4.82303e-08	14.6327	3.70396
Hgs	1.88292	12.2568	7.94729	4.99124e-07	1.14681e-05	6.41179	3.68821
AK035396	1.87928	10.0414	5.31301	6.37688e-05	0.00049679	1.4816	3.6789
Armcx5	1.87746	9.17413	14.3632	9.8249e-11	3.9067e-08	14.9514	3.67429
TC1679329	1.87436	8.51791	11.4059	3.13769e-09	3.51176e-07	11.5285	3.6664
NAP093547-001	1.86442	10.1	9.29952	5.87949e-08	2.46357e-06	8.58077	3.64122
Ranbp9	1.85866	10.7136	12.017	1.45029e-09	2.07933e-07	12.2979	3.62669
Abhd4	1.84468	13.6014	8.01947	4.42745e-07	1.05656e-05	6.53359	3.59174
4833427F10Rik	1.84285	8.37997	6.33992	8.61355e-06	0.000101775	3.51443	3.58719
Tns2	1.83402	10.8448	11.7307	2.07367e-09	2.49403e-07	11.9418	3.56529
2310057M21Rik	1.83393	9.78609	8.21561	3.20743e-07	8.43368e-06	6.86104	3.56506
Sbds	1.83122	11.3263	10.2005	1.58879e-08	1.01829e-06	9.90129	3.55837
Slc23a3	1.81672	8.54767	4.68088	0.000233211	0.00141115	0.171454	3.52279
Ifrd1	1.81452	12.0192	14.5197	8.32263e-11	3.52518e-08	15.1131	3.51742
S100a8	1.80865	8.67659	2.95592	0.00908352	0.0288895	-3.45722	3.50315
Pla2g12a	1.80385	11.8317	7.66252	8.06191e-07	1.64652e-05	5.92438	3.4915
Arid5b	1.80164	10.7265	10.4217	1.16736e-08	8.41586e-07	10.2114	3.48615
Bet1l	1.79619	9.92314	12.6753	6.53871e-10	1.23689e-07	13.0884	3.47302
Daxx	1.78524	11.3194	8.98738	9.44754e-08	3.40881e-06	8.10074	3.44676
Ell	1.77868	11.0424	19.1053	1.15849e-12	2.25721e-09	19.183	3.43112
E330037I15Rik	1.7741	8.63143	5.99358	1.66588e-05	0.000171463	2.8438	3.42026
Serpina3m	1.76992	7.97434	8.87973	1.11557e-07	3.86757e-06	7.93239	3.41035
Dpyd	1.76708	9.10968	9.3181	5.71781e-08	2.40099e-06	8.60897	3.40363
Plaur	1.75576	8.61356	6.83121	3.47542e-06	4.95355e-05	4.43785	3.37705
Med15	1.75081	10.0911	10.6761	8.23813e-09	6.63272e-07	10.5616	3.36548
TC1763752	1.74115	9.28104	16.8693	8.17373e-12	8.0478e-09	17.3479	3.34301
Usp3	1.73855	9.70726	18.2224	2.44102e-12	4.3237e-09	18.4886	3.337
Tmem37	1.73624	13.6267	4.39659	0.000423309	0.00227336	-0.428015	3.33166
BB713741	1.73608	9.80816	12.8513	5.31535e-10	1.0461e-07	13.2933	3.33129
Lbp	1.73303	10.1451	8.43457	2.25084e-07	6.56941e-06	7.22058	3.32424
Anapc16	1.73202	12.4035	13.033	4.30197e-10	9.45722e-08	13.5022	3.32194
Sertad2	1.72952	10.0159	10.6568	8.45702e-09	6.72558e-07	10.5353	3.31618
Mgea5	1.72019	9.05052	11.8412	1.80492e-09	2.32894e-07	12.0801	3.2948
Fam63a	1.71804	13.1825	11.9971	1.48647e-09	2.08362e-07	12.2734	3.2899
Pex16	1.7145	11.1322	11.3483	3.37979e-09	3.65583e-07	11.4542	3.28183
BC005537	1.70364	9.13116	13.4032	2.81734e-10	7.43071e-08	13.9193	3.25723
Tfdp2	1.69705	8.83508	10.8602	6.42738e-09	5.5412e-07	10.8107	3.24238
Amica1	1.68604	8.35899	13.6733	2.08148e-10	6.16215e-08	14.2167	3.21772
Cebpd	1.6815	13.7653	3.78709	0.00154717	0.00663405	-1.7221	3.20762
Gpnmb	1.68087	8.44859	9.45251	4.67877e-08	2.10474e-06	8.81173	3.20622
Pttg1ip	1.67032	11.3495	12.4037	9.04553e-10	1.50635e-07	12.7668	3.18285
Clec4d	1.66721	8.05231	10.3107	1.3618e-08	9.28392e-07	10.0565	3.176
Errfi1	1.66653	12.5755	3.45828	0.00312594	0.011898	-2.41713	3.1745
Tango2	1.66541	12.0048	10.3311	1.32364e-08	9.15266e-07	10.0851	3.17203
Otud5	1.65972	10.4598	13.7026	2.01478e-10	6.13374e-08	14.2487	3.15956
Odf2	1.65917	8.41061	12.1835	1.18176e-09	1.82741e-07	12.5015	3.15834
D130062J21Rik	1.6579	8.59886	6.51604	6.19761e-06	7.88501e-05	3.84928	3.15557
Ipo13	1.65331	14.676	10.1521	1.70075e-08	1.06441e-06	9.83272	3.14554
Xpa	1.64935	10.3004	9.59161	3.80998e-08	1.84732e-06	9.01926	3.13692
Uhrf1bp1l	1.6371	10.2081	9.01379	9.07199e-08	3.31951e-06	8.14182	3.1104
Kdm3a	1.62983	9.68757	13.2167	3.48279e-10	8.58972e-08	13.7105	3.09476
Plekhm2	1.62938	12.1672	9.9841	2.15827e-08	1.25525e-06	9.5927	3.0938
Papd7	1.62909	9.32661	7.15048	1.96119e-06	3.1839e-05	5.02007	3.09318
Txnip	1.62873	13.0608	4.76703	0.000194946	0.00121625	0.352074	3.09241
Strn4	1.62555	10.7627	11.8456	1.79485e-09	2.32894e-07	12.0857	3.08559
Plin4	1.62124	15.1292	5.94922	1.81484e-05	0.000183786	2.75677	3.07639
Trib3	1.61743	8.88654	7.20747	1.77335e-06	2.94813e-05	5.12251	3.06828
A430078G23Rik	1.61267	15.4825	8.14223	3.61646e-07	9.22291e-06	6.73913	3.05816
Aspscr1	1.60864	10.2042	5.93567	1.86304e-05	0.00018808	2.73014	3.04965
Psmd3	1.60375	14.8615	6.51585	6.19987e-06	7.88501e-05	3.84891	3.03933
Kank1	1.59705	10.6493	7.96349	4.85848e-07	1.12694e-05	6.43919	3.02523
Ppfibp2	1.59505	9.02943	10.3832	1.23126e-08	8.72358e-07	10.1578	3.02105
Trafd1	1.58681	12.8027	10.4056	1.19357e-08	8.5498e-07	10.1891	3.00384
Pnpla2	1.5846	12.3351	5.36945	5.69225e-05	0.000452131	1.59667	2.99925
Nmt1	1.58122	11.8633	13.8737	1.66822e-10	5.2425e-08	14.4338	2.99224
Lrg1	1.57971	11.5794	8.02874	4.36005e-07	1.05138e-05	6.54917	2.9891
Fkbp5	1.5796	10.8459	3.65784	0.00203992	0.00835724	-1.99605	2.98887
Srsf5	1.57673	12.7329	7.49407	1.07591e-06	2.00029e-05	5.63087	2.98294
AK134484	1.5752	11.0556	6.52487	6.09691e-06	7.77945e-05	3.86595	2.97976
Por	1.57304	10.7349	8.09696	3.89577e-07	9.74392e-06	6.66356	2.97532
Acadl	1.5669	12.3882	5.55824	3.90455e-05	0.000336208	1.97888	2.96268
Cdhr3	1.56429	8.56527	4.87413	0.000156173	0.00101905	0.575795	2.95733
Galnt15	1.55842	8.4154	9.77318	2.92315e-08	1.54911e-06	9.28676	2.94532
Pi4k2a	1.55799	9.24676	17.0942	6.64665e-12	7.61784e-09	17.5443	2.94444
Oser1	1.5572	12.4396	9.93346	2.32035e-08	1.29913e-06	9.51971	2.94282
Adgrf5	1.55697	10.4023	6.14334	1.24998e-05	0.000136901	3.13576	2.94235
Rab11b	1.55547	12.3031	8.84143	1.18391e-07	4.04688e-06	7.87214	2.9393
Ptpn11	1.5514	13.8677	11.0258	5.15519e-09	4.78303e-07	11.0317	2.931
Atg13	1.55052	11.2711	7.28982	1.53444e-06	2.64108e-05	5.26974	2.92924
Tax1bp1	1.55027	12.272	14.0967	1.30815e-10	4.80905e-08	14.6718	2.92873
Hbp1	1.54665	9.90707	15.4803	3.10448e-11	1.89024e-08	16.0692	2.92137
BC094435	1.54337	11.2925	5.58762	3.68355e-05	0.000321696	2.03799	2.91475
Lmbr1l	1.53536	10.8494	15.0342	4.87415e-11	2.39258e-08	15.633	2.89862
Chkb	1.52574	11.7104	8.86833	1.13547e-07	3.92262e-06	7.91447	2.87935
Uvrag	1.5201	10.8772	6.73188	4.16434e-06	5.71797e-05	4.25383	2.8681
Ubqln1	1.51961	10.3436	7.89177	5.47582e-07	1.232e-05	6.31762	2.86714
1700007K09Rik	1.51945	8.39085	12.127	1.26644e-09	1.91282e-07	12.4327	2.86682
Ccbl2	1.51258	9.72894	11.0312	5.11844e-09	4.77166e-07	11.0389	2.8532
Gm20485	1.50477	8.26366	4.36171	0.00045563	0.00241171	-0.501845	2.83778
Tcta	1.49318	9.94097	6.54083	5.91907e-06	7.61236e-05	3.89606	2.81509
AK141540	1.49238	8.50758	8.33039	2.66196e-07	7.31531e-06	7.05031	2.81352
Ccdc174	1.49232	10.696	8.00981	4.49891e-07	1.06509e-05	6.51732	2.81341
Tspyl2	1.49223	9.97003	10.3558	1.27896e-08	8.97508e-07	10.1196	2.81324
Irs2	1.4917	11.8837	3.68049	0.00194342	0.00804282	-1.94809	2.81219
Tbx6	1.49046	8.30112	9.72827	3.12009e-08	1.62981e-06	9.22096	2.80978
Agpat9	1.48723	10.032	6.75163	4.01684e-06	5.54278e-05	4.29053	2.80351
Zranb1	1.48676	11.6076	11.5593	2.5772e-09	3.00294e-07	11.725	2.80259
Gstm2	1.48481	12.1801	6.82624	3.5069e-06	4.98383e-05	4.42868	2.7988
Tiam2	1.4834	8.54646	10.6666	8.34589e-09	6.69182e-07	10.5486	2.79608
5031434O11Rik	1.48032	8.68458	8.10579	3.83957e-07	9.67751e-06	6.67832	2.7901
Nbr1	1.47735	9.54769	8.19644	3.30936e-07	8.59727e-06	6.82927	2.78437
Ctla2a	1.47517	11.3759	3.4415	0.00324005	0.0122629	-2.45239	2.78017
Arl8a	1.47016	9.88516	7.94469	5.0129e-07	1.14907e-05	6.40739	2.77052
Figf	1.46951	9.70579	5.73949	2.73054e-05	0.000254189	2.34185	2.76927
Snhg3	1.45798	11.4849	9.92032	2.36446e-08	1.31626e-06	9.50072	2.74723
Ehhadh	1.45777	9.42818	4.73547	0.000208157	0.00128508	0.285975	2.74684
Pias4	1.45278	8.95149	6.8608	3.29403e-06	4.7471e-05	4.4924	2.73734
Tbc1d17	1.45071	11.1327	9.63485	3.5758e-08	1.79564e-06	9.08333	2.73342
Ypel5	1.44634	8.031	9.33821	5.5481e-08	2.3551e-06	8.63944	2.72516
Lpin3	1.44615	9.60684	8.65002	1.59774e-07	5.04544e-06	7.56826	2.72481
Lpcat3	1.44173	10.3156	9.03113	8.83395e-08	3.2537e-06	8.16875	2.71647
Cda	1.43204	8.12565	10.0564	1.94725e-08	1.16739e-06	9.69639	2.69829
2610034E01Rik	1.43127	8.03681	13.6707	2.08736e-10	6.16215e-08	14.214	2.69685
Cbll1	1.43067	9.70161	13.385	2.87582e-10	7.43806e-08	13.8991	2.69572
Actr5	1.42982	9.54849	12.1488	1.23311e-09	1.8918e-07	12.4592	2.69412
Klf10	1.4279	10.9932	3.21505	0.00525067	0.018367	-2.92527	2.69055
Ypel3	1.4228	13.51	7.96383	4.85577e-07	1.12694e-05	6.43976	2.68106
Coasy	1.41696	11.4442	9.51484	4.2662e-08	1.99335e-06	8.90501	2.67023
Herpud2	1.41575	9.26899	4.66095	0.000243108	0.00145835	0.129593	2.66798
Slc20a2	1.41012	10.2295	9.73134	3.1062e-08	1.62692e-06	9.22546	2.6576
D330050I16Rik	1.40645	8.13744	11.7387	2.05289e-09	2.49186e-07	11.9519	2.65084
Cnppd1	1.40337	10.9198	5.00121	0.000120227	0.0008283	0.839994	2.64519
Fbxo4	1.40271	10.6199	7.56919	9.45531e-07	1.83129e-05	5.76226	2.64399
Slc25a33	1.39551	10.4326	9.14248	7.4535e-08	2.89291e-06	8.34077	2.63081
Adprhl2	1.39316	9.72895	9.46656	4.58228e-08	2.08601e-06	8.83279	2.62653
Dazap2	1.393	13.5702	8.37668	2.47036e-07	6.98586e-06	7.12613	2.62624
Sestd1	1.39267	9.42213	9.36389	5.33898e-08	2.31137e-06	8.67829	2.62564
Cnih2	1.39231	8.0804	9.83044	2.69082e-08	1.45633e-06	9.37032	2.62498
Fus	1.39155	12.1538	7.64527	8.3023e-07	1.67803e-05	5.8945	2.62361
AA467197	1.38887	7.83867	7.63126	8.50298e-07	1.70445e-05	5.87022	2.61874
Eif4a1	1.38641	12.8475	14.2053	1.16349e-10	4.3595e-08	14.7863	2.61428
Lox	1.38566	8.33821	8.34574	2.59677e-07	7.21385e-06	7.07547	2.61292
Rbl2	1.38421	9.18858	8.37215	2.48846e-07	7.00652e-06	7.11872	2.6103
Nfil3	1.38237	11.4399	5.90146	1.99075e-05	0.000199371	2.66277	2.60695
Mlycd	1.37295	13.5067	6.48884	6.51901e-06	8.21581e-05	3.79784	2.59
Il1r1	1.37288	9.23383	7.53234	1.00729e-06	1.90792e-05	5.6979	2.58986
Npc1	1.37276	9.76021	5.24026	7.38612e-05	0.00055953	1.33281	2.58965
Saa2	1.37217	7.73172	4.17685	0.000673936	0.00333866	-0.893966	2.5886
Nfkbib	1.37196	10.46	10.6335	8.73036e-09	6.83142e-07	10.5033	2.58822
Ctnnbl1	1.3713	11.1544	7.46508	1.13113e-06	2.07327e-05	5.57997	2.58704
Fbxo30	1.36651	8.795	12.9199	4.90561e-10	1.00514e-07	13.3725	2.57847
Zfp771	1.36472	13.4318	8.6387	1.62655e-07	5.10771e-06	7.55013	2.57526
Syf2	1.35918	10.4304	11.4945	2.79997e-09	3.19216e-07	11.6422	2.56539
Pnpla7	1.35858	11.2241	5.58943	3.67035e-05	0.000320686	2.04163	2.56432
Foxo1	1.35818	10.8991	3.52916	0.00268641	0.0104935	-2.26791	2.56361
Wbp1l	1.35768	13.8972	6.39841	7.71791e-06	9.36337e-05	3.62611	2.56273
Usp53	1.35655	7.84193	15.7713	2.32725e-11	1.51147e-08	16.3469	2.56071
Lgals3	1.35468	11.1283	3.25107	0.00486337	0.0172821	-2.85046	2.55741
Ccdc59	1.35337	10.5546	11.9672	1.54263e-09	2.10647e-07	12.2365	2.55509
Sqstm1	1.35064	13.6065	6.37935	7.99866e-06	9.61852e-05	3.58976	2.55026
Map2k3os	1.34701	9.45176	5.26299	7.05421e-05	0.00053942	1.37937	2.54384
Mocos	1.34362	9.93366	7.41064	1.24295e-06	2.23411e-05	5.48407	2.53787
Ect2l	1.34169	7.82526	6.01049	1.61247e-05	0.00016667	2.87692	2.53448
Rab9	1.34019	11.4218	19.1443	1.1218e-12	2.25721e-09	19.2128	2.53185
Pik3ip1	1.33966	12.01	3.82498	0.00142679	0.00618673	-1.64167	2.53091
Ddx27	1.33874	9.63297	9.17106	7.13713e-08	2.80929e-06	8.38466	2.5293
Chrna1	1.33856	9.78308	3.79566	0.00151908	0.00653372	-1.70391	2.52899
Ctdp1	1.33497	8.81918	18.0388	2.86197e-12	4.64688e-09	18.3394	2.5227
Wdr92	1.33449	9.85919	9.02874	8.86635e-08	3.25947e-06	8.16504	2.52186
Eapp	1.33415	11.564	8.36673	2.51029e-07	7.01728e-06	7.10986	2.52128
9530053J19Rik	1.33369	10.2432	5.01547	0.000116761	0.00081	0.869557	2.52047
Gm11974	1.33153	9.71341	9.59224	3.80643e-08	1.84732e-06	9.02021	2.51669
Gins1	1.32923	8.80641	12.2527	1.08602e-09	1.72032e-07	12.5854	2.51269
4833418N02Rik	1.32785	9.3207	6.13967	1.25878e-05	0.000137787	3.12862	2.51028
Rnd1	1.32408	8.75571	4.18221	0.000666317	0.0033026	-0.882595	2.50372
1110038B12Rik	1.32354	10.3253	11.2197	3.99497e-09	4.01226e-07	11.287	2.50279
Acacb	1.3224	11.712	7.07668	2.23576e-06	3.53011e-05	4.88674	2.50082
Hoga1	1.32051	8.33292	11.1898	4.15457e-09	4.10902e-07	11.2478	2.49754
Shd	1.32042	7.98804	9.4874	4.44296e-08	2.05134e-06	8.86399	2.49738
1700037F03Rik	1.3199	8.1764	6.91395	2.99249e-06	4.40501e-05	4.5901	2.49648
NAP112057-1	1.31779	8.93709	10.3334	1.31933e-08	9.15266e-07	10.0883	2.49284
Yrdc	1.31714	9.04203	12.7298	6.13095e-10	1.19456e-07	13.1521	2.49172
Lingo4	1.31553	7.75765	5.19123	8.15787e-05	0.000606711	1.23221	2.48894
Rbm12	1.31487	9.45714	13.9342	1.56113e-10	5.08301e-08	14.4988	2.4878
Stx5a	1.31438	12.8	11.2867	3.66107e-09	3.85579e-07	11.3743	2.48696
Rnf125	1.31421	8.74471	6.63946	4.93343e-06	6.54788e-05	4.08139	2.48666
Spg20	1.31324	8.51077	7.47501	1.11188e-06	2.04956e-05	5.59742	2.48499
Cwc22	1.31293	9.65654	11.0183	5.20712e-09	4.78564e-07	11.0217	2.48446
NAP096054-001	1.31198	14.153	7.40196	1.26183e-06	2.2597e-05	5.46873	2.48281
Papd4	1.30805	10.3478	10.9022	6.07619e-09	5.35695e-07	10.867	2.47606
Snrnp48	1.30753	9.0566	11.8771	1.7257e-09	2.25661e-07	12.1248	2.47518
2310075C17Rik	1.3073	9.41283	3.7371	0.00172175	0.00725026	-1.82814	2.47477
Gab1	1.30649	9.15898	9.84538	2.63342e-08	1.43323e-06	9.39207	2.47339
Nudt16	1.30386	9.34576	5.38901	5.47308e-05	0.000438477	1.63646	2.46888
Nfkbia	1.29995	12.6643	4.1504	0.000712881	0.0034934	-0.950144	2.4622
Sat1	1.29307	9.98986	8.5357	1.91502e-07	5.77589e-06	7.38453	2.45048
Bbc3	1.2924	9.28954	5.10832	9.65703e-05	0.000694052	1.06152	2.44936
Ctla2b	1.29184	10.8515	2.71759	0.014937	0.0439295	-3.93434	2.4484
Ulk1	1.29072	13.3083	7.06006	2.30296e-06	3.60698e-05	4.85661	2.44651
Nup50	1.28999	8.93265	9.42407	4.88077e-08	2.16129e-06	8.76901	2.44527
Agpat3	1.28978	12.0646	5.92497	1.90205e-05	0.000191522	2.70908	2.44491
Musk	1.28947	9.52151	3.21373	0.00526535	0.0184084	-2.92799	2.44438
Cpm	1.28864	9.88228	6.17638	1.17373e-05	0.000130011	3.19975	2.44298
Hist1h3d	1.28417	13.3349	9.64914	3.50181e-08	1.77219e-06	9.10444	2.43541
Hectd1	1.28247	10.8596	11.7521	2.01837e-09	2.47333e-07	11.9688	2.43256
Atf3	1.27877	9.12433	2.84322	0.0115035	0.0353468	-3.68453	2.42633
Neu1	1.27718	12.198	9.61702	3.6705e-08	1.82266e-06	9.05693	2.42365
Atf4	1.27622	13.2271	8.91659	1.05371e-07	3.7396e-06	7.99019	2.42204
Ifi30	1.26926	10.5088	3.6533	0.00205984	0.0084156	-2.00566	2.41039
Cep85	1.26924	8.44651	10.2814	1.4185e-08	9.45774e-07	10.0154	2.41034
Bckdha	1.26754	13.9975	7.49326	1.07742e-06	2.00119e-05	5.62945	2.4075
Hsbp1l1	1.26719	9.39256	3.94929	0.00109405	0.00497236	-1.37757	2.40692
Cyth2	1.26613	11.7921	10.588	9.28799e-09	7.12469e-07	10.4412	2.40515
Gzf1	1.26607	10.0318	9.10356	7.90834e-08	3.01538e-06	8.28081	2.40506
Phf3	1.26578	10.1259	8.08003	4.00591e-07	9.94282e-06	6.63524	2.40458
F830014O18Rik	1.26376	8.71163	6.03666	1.53331e-05	0.000160273	2.92808	2.4012
Igf1r	1.26306	9.88035	8.28245	2.87691e-07	7.70376e-06	6.97147	2.40004
Taf1d	1.26156	7.9993	9.61593	3.67637e-08	1.82266e-06	9.05532	2.39755
Arrdc4	1.26002	8.73088	8.88274	1.11038e-07	3.85643e-06	7.93712	2.39498
NAP112892-1	1.25835	8.53995	12.0051	1.47187e-09	2.08362e-07	12.2832	2.39221
Got1	1.25746	14.5937	6.19255	1.13816e-05	0.00012701	3.23104	2.39075
Twf2	1.25727	13.2237	5.65609	3.2173e-05	0.00028981	2.17532	2.39043
X16670	1.25589	10.1724	5.53874	4.05872e-05	0.000347605	1.9396	2.38814
Junb	1.25405	7.95506	4.86096	0.00016048	0.00103846	0.548337	2.3851
Psmd1	1.25282	13.1914	3.80685	0.00148316	0.0064004	-1.68015	2.38306
Mtmr4	1.2525	8.29121	8.76215	1.33971e-07	4.41672e-06	7.74684	2.38253
Snhg7	1.25238	9.15836	15.0333	4.87896e-11	2.39258e-08	15.632	2.38235
Fah	1.25118	8.40706	5.31051	6.40899e-05	0.000498893	1.47652	2.38036
Gm42102	1.24713	9.35742	8.56528	1.82708e-07	5.57103e-06	7.43222	2.37369
Zfp593	1.24328	9.41966	7.56555	9.51459e-07	1.83729e-05	5.7559	2.36737
Sh2b2	1.24166	9.71678	4.60647	0.000272407	0.00160253	0.0150322	2.36471
Nrap	1.2403	13.2526	4.38305	0.000435571	0.00232396	-0.456672	2.36247
Eci2	1.24011	13.555	7.74446	7.01538e-07	1.48805e-05	6.06576	2.36216
Usp19	1.2393	10.6877	10.3517	1.28624e-08	8.98245e-07	10.1139	2.36085
Sik1	1.23878	8.83046	4.38611	0.000432762	0.00231329	-0.450181	2.35999
Fas	1.23675	10.3219	6.38773	7.87393e-06	9.50531e-05	3.60575	2.35667
Ankzf1	1.23572	9.90393	8.30843	2.75826e-07	7.47454e-06	7.01423	2.355
Ip6k1	1.2354	10.2365	6.56889	5.61943e-06	7.29926e-05	3.94892	2.35446
Rab3gap1	1.23484	9.25237	7.21591	1.74716e-06	2.91576e-05	5.13765	2.35355
Psmc4	1.23225	13.2142	7.11162	2.1011e-06	3.36383e-05	4.94995	2.34933
Lrrc2	1.23191	11.8963	3.81578	0.0014551	0.00629049	-1.66119	2.34878
Pan2	1.23155	10.2696	13.895	1.62958e-10	5.20503e-08	14.4567	2.34818
Slc25a28	1.231	11.9453	10.2795	1.42225e-08	9.45774e-07	10.0127	2.3473
Btg3	1.2307	10.8481	5.58678	3.68973e-05	0.000322091	2.03629	2.3468
Bcl7b	1.23059	10.5054	8.79415	1.27438e-07	4.24804e-06	7.79752	2.34664
Btg1	1.22801	9.86527	12.5346	7.73002e-10	1.41307e-07	12.9226	2.34243
Amotl2	1.228	9.90912	7.42479	1.21282e-06	2.18802e-05	5.50903	2.34243
Rnf146	1.22683	8.75196	13.1141	3.91775e-10	9.15874e-08	13.5945	2.34052
Psmd11	1.22314	12.3731	7.67591	7.88029e-07	1.62476e-05	5.94755	2.33454
Gpalpp1	1.22301	10.9549	8.52528	1.94707e-07	5.83733e-06	7.36769	2.33434
Setd1a	1.2205	9.75478	8.19116	3.33805e-07	8.66026e-06	6.8205	2.33027
Heca	1.21903	9.77038	8.12246	3.73578e-07	9.47739e-06	6.70616	2.32791
Siah1a	1.21851	8.15611	13.6325	2.17814e-10	6.33416e-08	14.1722	2.32706
Prr14	1.218	11.8309	14.383	9.61988e-11	3.90487e-08	14.9719	2.32623
Psmb3	1.21695	15.4816	7.10858	2.11246e-06	3.37648e-05	4.94447	2.32455
Cfh	1.2168	9.76262	6.57949	5.51032e-06	7.17667e-05	3.96887	2.32431
Asb6	1.21663	11.0616	12.3847	9.25458e-10	1.51059e-07	12.7442	2.32403
Cldn5	1.21655	11.543	3.39876	0.00354975	0.0132395	-2.54208	2.32391
Dnajb9	1.21546	9.88006	9.44123	4.75786e-08	2.12619e-06	8.79479	2.32215
Sctr	1.212	10.2678	3.74233	0.00170261	0.00718357	-1.81705	2.31659
Ythdc1	1.21001	11.8463	9.71079	3.20046e-08	1.66288e-06	9.19529	2.31339
Atrip	1.20991	10.5732	8.62905	1.65152e-07	5.14029e-06	7.53468	2.31323
Slc41a1	1.20805	9.83419	4.17665	0.00067423	0.00333927	-0.894402	2.31025
Acox1	1.20739	13.5661	5.8019	2.4165e-05	0.000232394	2.46591	2.30919
A430110L20Rik	1.20703	8.13124	7.05201	2.33623e-06	3.64664e-05	4.84202	2.30862
Lemd2	1.20419	13.0548	8.03116	4.3426e-07	1.04911e-05	6.55325	2.30408
Dnajc16	1.20109	8.78355	8.54268	1.89389e-07	5.72102e-06	7.39578	2.29913
Ankrd11	1.19853	9.97487	10.0542	1.95336e-08	1.16746e-06	9.69323	2.29505
1700029I15Rik	1.1982	8.47772	8.4308	2.2645e-07	6.58046e-06	7.21444	2.29453
Atg2a	1.19818	9.71497	12.0689	1.36025e-09	1.99271e-07	12.3616	2.2945
Wbscr27	1.19744	8.29314	8.02546	4.38373e-07	1.05422e-05	6.54367	2.29332
Arrdc3	1.19713	9.2285	3.39763	0.0035583	0.0132638	-2.54444	2.29283
Chil3	1.19339	7.95737	5.59855	3.60469e-05	0.000316578	2.05995	2.2869
Pcsk4	1.19303	8.63476	5.50991	4.29833e-05	0.000363492	1.88142	2.28633
Zswim8	1.19245	11.1484	8.69713	1.48349e-07	4.76184e-06	7.64349	2.2854
Osbpl11	1.19221	10.3327	10.1011	1.82764e-08	1.10934e-06	9.76025	2.28502
Clasrp	1.19218	11.7881	7.15008	1.96257e-06	3.1839e-05	5.01936	2.28498
Chrdl2	1.19101	8.79372	7.06129	2.29789e-06	3.60193e-05	4.85885	2.28313
Stat3	1.18946	10.218	11.2295	3.94457e-09	4.00292e-07	11.2997	2.28067
Tbk1	1.18882	9.14673	10.8756	6.2963e-09	5.47666e-07	10.8313	2.27967
Otulin	1.18131	10.5319	5.59863	3.60412e-05	0.000316578	2.06011	2.26782
Ccno	1.18093	7.79212	14.9733	5.18854e-11	2.4657e-08	15.5724	2.26722
Wnt11	1.18081	8.77336	6.95292	2.78979e-06	4.18124e-05	4.66147	2.26704
Sin3a	1.1801	8.70552	7.37576	1.32064e-06	2.34348e-05	5.42239	2.26592
Fbxo31	1.17537	12.6943	9.24093	6.42144e-08	2.60657e-06	8.49158	2.25851
Sorbs3	1.17495	9.30803	6.1809	1.16367e-05	0.000129338	3.20851	2.25785
Eif3d	1.1717	13.7934	7.27434	1.57663e-06	2.70652e-05	5.24215	2.25276
Atp6v1h	1.17052	9.31687	10.2815	1.41836e-08	9.45774e-07	10.0155	2.25092
Psmd4	1.17037	15.2311	6.34403	8.54722e-06	0.000101236	3.52229	2.2507
Frmd8os	1.16994	10.0015	4.18746	0.000658929	0.00326848	-0.871441	2.25002
Sap130	1.16971	10.1018	7.92668	5.16566e-07	1.17579e-05	6.37688	2.24966
Chpf2	1.16757	10.0164	9.03487	8.7835e-08	3.24565e-06	8.17455	2.24633
Arfgap3	1.16738	8.6995	6.33354	8.71744e-06	0.000102567	3.50223	2.24604
Greb1	1.16734	8.02199	10.7014	7.96049e-09	6.46259e-07	10.596	2.24597
Apold1	1.16695	8.35481	3.29154	0.00446183	0.0160925	-2.76622	2.24536
Art5	1.16689	11.5273	5.34482	5.98126e-05	0.000471245	1.54649	2.24528
Zfp410	1.16652	9.19681	19.4582	8.67613e-13	2.11307e-09	19.4504	2.2447
Scgb3a1	1.16388	7.93747	12.4588	8.4653e-10	1.45154e-07	12.8326	2.24059
Cd14	1.16326	9.44455	6.52822	6.0591e-06	7.73694e-05	3.87227	2.23962
Bclaf1	1.16287	11.1827	8.56787	1.81958e-07	5.55684e-06	7.43639	2.23902
Mrgprg	1.16278	7.84769	5.1918	8.1485e-05	0.000606437	1.23337	2.23888
Nat6	1.16251	9.84367	5.63282	3.36846e-05	0.000300646	2.12873	2.23847
Gm8350	1.16142	8.09958	10.0166	2.06072e-08	1.20574e-06	9.63932	2.23678
Rhbdf2	1.16076	8.89603	6.29435	9.3858e-06	0.000109113	3.4271	2.23576
Dgcr14	1.16022	10.2763	7.14436	1.98256e-06	3.211e-05	5.00904	2.23492
Spryd7	1.15863	10.619	4.93231	0.000138517	0.000925857	0.696924	2.23245
Dido1	1.15807	9.72833	9.41047	4.98057e-08	2.18562e-06	8.74855	2.23159
Mbd5	1.15606	8.98948	13.9318	1.56529e-10	5.08301e-08	14.4962	2.22848
9530068E07Rik	1.15583	13.1295	5.17333	8.45992e-05	0.000623226	1.19542	2.22813
Orc2	1.15525	8.63129	11.3203	3.50466e-09	3.7206e-07	11.4179	2.22722
Epc2	1.15432	9.17429	10.724	7.72079e-09	6.33773e-07	10.6267	2.2258
Xab2	1.15371	10.3488	7.42644	1.20936e-06	2.1838e-05	5.51194	2.22485
Hrct1	1.15154	10.1273	5.67143	3.12143e-05	0.00028327	2.20603	2.22151
Bri3	1.14953	13.244	8.4447	2.2146e-07	6.50819e-06	7.23705	2.21842
Ing1	1.14919	9.07044	11.605	2.43143e-09	2.88866e-07	11.7831	2.21789
Shc1	1.14913	9.61156	10.8082	6.8922e-09	5.8523e-07	10.7406	2.2178
Mrpl41	1.14741	10.6737	8.85416	1.16072e-07	3.99567e-06	7.89219	2.21516
Setd4	1.14731	9.5191	4.69746	0.000225291	0.00137217	0.206264	2.215
Adrb2	1.14653	9.42646	4.86946	0.000157686	0.00102569	0.566066	2.2138
Mllt10	1.14549	9.62771	6.07038	1.43719e-05	0.000152767	2.99388	2.21221
Clip1	1.14545	12.2577	3.89961	0.00121648	0.00543123	-1.48315	2.21216
Zfp655	1.14529	9.34813	15.9285	1.99582e-11	1.43752e-08	16.4946	2.21191
A830035O19Rik	1.14445	8.17482	10.624	8.8429e-09	6.8918e-07	10.4905	2.21062
Maml1	1.14433	9.69916	8.62708	1.65667e-07	5.14808e-06	7.53153	2.21043
Socs2	1.14428	9.59003	3.67694	0.00195823	0.00809118	-1.95561	2.21036
Wdr5	1.14326	10.7806	7.76648	6.75905e-07	1.44401e-05	6.1036	2.2088
Psma5	1.14321	13.348	6.99518	2.58605e-06	3.93645e-05	4.73864	2.20872
Ubfd1	1.13713	10.1735	7.53361	1.0051e-06	1.90684e-05	5.70012	2.19942
Furin	1.13628	9.26176	7.32638	1.43936e-06	2.51959e-05	5.33482	2.19813
Tmem181a	1.13596	9.2147	5.70859	2.90129e-05	0.000267149	2.28026	2.19765
Nubp2	1.1334	9.97377	8.38561	2.43509e-07	6.91621e-06	7.14073	2.19375
Phkg2	1.13188	10.7226	8.01006	4.497e-07	1.06509e-05	6.51775	2.19144
Tbc1d20	1.13156	9.61203	7.6129	8.77377e-07	1.73685e-05	5.83834	2.19096
Ranbp10	1.13154	11.725	6.03572	1.53607e-05	0.00016039	2.92625	2.19092
Rusc2	1.12963	11.3541	5.77183	2.56288e-05	0.000242169	2.40619	2.18803
Cox8a	1.12935	14.304	8.03985	4.28066e-07	1.04167e-05	6.56785	2.1876
Usp9x	1.12864	9.23809	6.81026	3.61014e-06	5.10449e-05	4.39915	2.18653
Erbb2ip	1.12847	9.33603	8.66501	1.56044e-07	4.95172e-06	7.59221	2.18626
Sart3	1.12671	11.2246	12.3716	9.40208e-10	1.51397e-07	12.7285	2.1836
Atf5	1.1261	14.2671	4.00031	0.000981246	0.00454339	-1.26913	2.18268
Ddx21	1.12558	9.01457	8.69822	1.48097e-07	4.76184e-06	7.64521	2.1819
Pom121	1.12435	10.2933	9.14363	7.44046e-08	2.89291e-06	8.34254	2.18003
Ppp1r13b	1.12403	11.2022	9.97928	2.17318e-08	1.25525e-06	9.58576	2.17955
Eif5	1.12252	12.6671	8.3112	2.74592e-07	7.45147e-06	7.01878	2.17727
Sts	1.12167	11.1369	3.32071	0.00419294	0.0152587	-2.70537	2.17599
Polr2a	1.1212	8.76013	6.3558	8.36024e-06	9.9445e-05	3.54479	2.17528
Max	1.11863	11.1034	7.89079	5.48477e-07	1.23259e-05	6.31596	2.17141
Gm38958	1.11459	7.85879	11.225	3.96767e-09	4.0055e-07	11.2938	2.16533
Pdcd6	1.11398	12.7863	9.10916	7.84112e-08	3.00344e-06	8.28945	2.16442
Nsmce1	1.11389	10.7571	4.98196	0.000125073	0.000854761	0.80006	2.16429
Bsdc1	1.11328	8.67538	8.776	1.31101e-07	4.35901e-06	7.76879	2.16337
Etfdh	1.11285	12.9289	5.12276	9.3769e-05	0.000677166	1.09129	2.16273
Rasd1	1.11009	8.24352	6.01848	1.58786e-05	0.000164738	2.89255	2.15859
Adck4	1.10953	9.0601	7.37584	1.32046e-06	2.34348e-05	5.42253	2.15776
Slc25a20	1.10851	10.8907	4.02053	0.000939846	0.00438505	-1.22615	2.15623
Slc35b3	1.10828	8.7491	9.72617	3.12964e-08	1.63042e-06	9.21787	2.15588
Smg6	1.10567	11.2716	7.68013	7.82398e-07	1.61486e-05	5.95484	2.15199
Poldip3	1.10499	11.7861	9.43278	4.81798e-08	2.14323e-06	8.78209	2.15097
Sik3	1.10444	10.4128	9.61088	3.70371e-08	1.83155e-06	9.04784	2.15016
Ddx24	1.10323	13.2708	6.01942	1.58497e-05	0.000164526	2.8944	2.14835
BB237529	1.10295	8.53622	8.36872	2.50225e-07	7.00675e-06	7.11311	2.14793
Pank1	1.10246	8.09443	4.71973	0.000215087	0.00132159	0.252969	2.14721
Rbm33	1.10153	10.0371	8.73123	1.40617e-07	4.60467e-06	7.69776	2.14583
Xpo4	1.10101	7.95451	12.4751	8.30129e-10	1.45154e-07	12.852	2.14505
Slc25a38	1.10048	11.5156	6.8519	3.34753e-06	4.80998e-05	4.476	2.14426
Agt	1.09943	8.9655	5.5103	4.295e-05	0.000363368	1.88221	2.1427
Tbc1d23	1.09898	10.1702	6.92526	2.93214e-06	4.33129e-05	4.61083	2.14204
Rbm8a	1.09436	10.7128	10.943	5.75467e-09	5.20336e-07	10.9215	2.13519
Slc15a2	1.09403	8.73393	3.0299	0.00777273	0.025383	-3.30657	2.1347
Orm2	1.09373	8.38028	3.05504	0.00737078	0.024304	-3.25513	2.13425
Nup93	1.09332	10.4178	5.01621	0.000116584	0.000809454	0.871084	2.13364
Psmc1	1.09302	13.3582	8.63873	1.62646e-07	5.10771e-06	7.55019	2.13321
Tmcc3	1.093	10.4242	10.722	7.74163e-09	6.33773e-07	10.624	2.13318
Echs1	1.09201	13.4562	6.43592	7.19494e-06	8.84456e-05	3.69748	2.13171
Slc7a8	1.09163	8.8321	4.128	0.000747651	0.00363273	-0.997744	2.13115
4931431B13Rik	1.09122	7.83285	6.53022	6.0367e-06	7.72285e-05	3.87604	2.13054
Fzd4	1.09052	11.8584	3.22071	0.00518784	0.0182126	-2.91352	2.12951
Brms1	1.08985	9.55745	8.62468	1.66298e-07	5.15947e-06	7.52767	2.12851
Nhsl1	1.08918	9.14285	8.42832	2.27353e-07	6.59189e-06	7.2104	2.12753
Timm10	1.08845	12.7992	8.43324	2.25566e-07	6.56941e-06	7.21841	2.12645
Bnip3	1.08603	13.2661	9.04132	8.69715e-08	3.23388e-06	8.18455	2.12288
6430548M08Rik	1.08602	8.92735	5.30859	6.43391e-05	0.000500385	1.47259	2.12287
Sirt1	1.0851	9.88535	7.19742	1.80507e-06	2.98603e-05	5.10447	2.12153
Lincpint	1.08422	9.8461	2.77971	0.0131311	0.0394215	-3.81131	2.12024
Jmjd1c	1.0842	10.2741	9.17579	7.08609e-08	2.79485e-06	8.39192	2.12019
Rell1	1.08314	10.6681	3.94171	0.00111191	0.00503355	-1.39369	2.11865
LOC106740	1.08268	10.2483	8.41964	2.30541e-07	6.67439e-06	7.19627	2.11797
Dhx15	1.08226	9.24724	10.7803	7.15629e-09	5.98426e-07	10.7029	2.11735
Ddt	1.08079	13.0974	8.69737	1.48294e-07	4.76184e-06	7.64386	2.11519
1810032O08Rik	1.0801	9.28044	4.6263	0.000261348	0.00155036	0.0567496	2.11418
Tmbim1	1.07986	11.9106	5.44459	4.89664e-05	0.000402449	1.74927	2.11383
Lrrc47	1.07956	10.9232	7.31211	1.47573e-06	2.56267e-05	5.30943	2.11339
Wwp2	1.0794	10.9169	5.36798	5.70915e-05	0.000453104	1.59367	2.11316
Rab40c	1.07878	10.7391	7.10766	2.1159e-06	3.37838e-05	4.94281	2.11224
Mnt	1.0779	11.4146	8.10039	3.87381e-07	9.72646e-06	6.66931	2.11095
Dusp26	1.07703	13.256	3.47882	0.00299168	0.0114721	-2.37393	2.10968
Wiz	1.07653	10.279	10.1761	1.64422e-08	1.0435e-06	9.86677	2.10896
Ezh1	1.07552	10.5332	4.98108	0.000125299	0.000855706	0.798235	2.10748
Eml2	1.07541	10.2235	3.80253	0.00149692	0.00645264	-1.68932	2.10732
Dapk1	1.0745	9.03403	6.41758	7.44594e-06	9.10142e-05	3.6626	2.106
Nfkbil1	1.0737	11.081	8.82727	1.21027e-07	4.10103e-06	7.84982	2.10482
Prosc	1.07175	10.1156	11.4081	3.12883e-09	3.51176e-07	11.5313	2.10198
Acvr1b	1.07161	8.47201	6.80748	3.62844e-06	5.11923e-05	4.39401	2.10177
Cth	1.07052	8.50664	7.06584	2.27935e-06	3.57839e-05	4.8671	2.10018
Ist1	1.06815	10.892	7.36494	1.34575e-06	2.3837e-05	5.40323	2.09674
Pak1	1.06257	10.0235	3.82332	0.00143185	0.00620511	-1.64519	2.08866
LOC102638002	1.0609	7.84692	11.1623	4.30686e-09	4.23812e-07	11.2117	2.08623
Pan3	1.06068	9.94357	6.8905	3.1218e-06	4.55279e-05	4.54705	2.08591
Mcm7	1.06002	10.206	8.75974	1.34477e-07	4.42593e-06	7.74302	2.08496
Zfp280d	1.05977	9.06825	10.3674	1.25856e-08	8.88472e-07	10.1358	2.0846
Taf5l	1.05977	10.7655	10.3255	1.33401e-08	9.15266e-07	10.0772	2.0846
Usp30	1.05922	9.83742	9.35666	5.39705e-08	2.32133e-06	8.66735	2.0838
Tbcel	1.05882	9.33298	9.2736	6.11309e-08	2.51282e-06	8.54136	2.08323
Tacc3	1.05662	9.00341	6.03079	1.55068e-05	0.000161397	2.91663	2.08006
Foxf1	1.05561	7.78484	9.69057	3.29618e-08	1.69453e-06	9.16554	2.07859
Malsu1	1.05528	14.7126	6.21761	1.08527e-05	0.000122228	3.27942	2.07812
Acbd3	1.05236	9.81261	5.82921	2.29109e-05	0.000222198	2.52003	2.07392
Taf8	1.05093	8.87914	8.55502	1.8571e-07	5.63343e-06	7.41569	2.07186
Zfyve27	1.05082	9.59421	9.04441	8.65614e-08	3.23096e-06	8.18934	2.07171
Prr7	1.05047	7.78408	7.4534	1.1542e-06	2.10566e-05	5.55943	2.07121
Rit1	1.05009	12.4742	6.06297	1.45775e-05	0.000154195	2.97944	2.07066
Safb2	1.04949	10.4488	10.8923	6.15717e-09	5.40388e-07	10.8537	2.06979
Ucp3	1.04913	10.1678	3.10219	0.00667125	0.0223992	-3.15837	2.06929
Gsdma	1.04889	7.97743	4.37437	0.000443614	0.00236029	-0.475033	2.06894
Eva1c	1.04822	8.49006	9.06172	8.42984e-08	3.16468e-06	8.21616	2.06798
Trappc12	1.04737	10.674	5.07454	0.000103465	0.000734276	0.99177	2.06675
2310058N22Rik	1.04712	9.18385	6.74963	4.0315e-06	5.55515e-05	4.28682	2.06639
Bmp4	1.04702	10.8041	6.93758	2.8678e-06	4.2689e-05	4.6334	2.06625
5730419F03Rik	1.04622	8.18752	5.66631	3.15307e-05	0.000285476	2.19579	2.06511
Kansl3	1.04578	12.0684	7.32362	1.44633e-06	2.52738e-05	5.32991	2.06448
Dab2ip	1.03993	10.6086	10.4197	1.17055e-08	8.41586e-07	10.2087	2.05613
Slc25a5	1.03946	8.9909	6.30634	9.1759e-06	0.00010712	3.45011	2.05546
Ffar4	1.03886	7.72925	3.60976	0.00226097	0.00909804	-2.09776	2.05461
Anxa13	1.03791	7.6959	8.96675	9.75235e-08	3.49935e-06	8.06858	2.05324
Lin52	1.03667	9.35334	9.51962	4.23621e-08	1.98409e-06	8.91214	2.05148
Arhgap35	1.0351	11.2411	5.77112	2.56644e-05	0.000242387	2.40478	2.04926
Acadvl	1.03446	15.7676	4.29407	0.000525658	0.00270022	-0.645192	2.04835
Ppard	1.0342	11.0919	8.03961	4.28236e-07	1.04167e-05	6.56744	2.04798
Cpsf7	1.03314	11.2035	9.86003	2.57843e-08	1.40723e-06	9.41335	2.04647
Fam117b	1.03213	9.92007	4.68788	0.000229833	0.00139591	0.186154	2.04504
Slc27a1	1.03197	10.7169	3.64621	0.00209133	0.00852565	-2.02066	2.04481
Ube2o	1.03127	11.8447	3.87351	0.00128622	0.00568656	-1.5386	2.04382
Pip4k2c	1.03105	10.6107	6.24883	1.02291e-05	0.000116757	3.3396	2.04351
Arih2	1.03026	11.9219	7.07209	2.25411e-06	3.55333e-05	4.87843	2.04239
Gpatch1	1.02826	9.28186	6.88679	3.14283e-06	4.57744e-05	4.54022	2.03956
Rorc	1.02595	9.55044	4.86125	0.000160383	0.00103817	0.548948	2.0363
Zfp869	1.02522	10.2959	5.23143	7.51934e-05	0.000567301	1.31471	2.03528
Ing5	1.02502	8.49617	7.67489	7.89398e-07	1.62586e-05	5.94579	2.03499
Gna13	1.0244	9.04378	10.9334	5.82865e-09	5.20336e-07	10.9087	2.03411
Zc3h3	1.02335	10.428	7.80617	6.3216e-07	1.37008e-05	6.17163	2.03263
Rassf1	1.02282	11.9757	6.6938	4.46491e-06	6.05389e-05	4.18292	2.03189
Arl14ep	1.02156	8.27	10.6479	8.56092e-09	6.77137e-07	10.523	2.03011
Setd2	1.0215	9.8929	9.36185	5.35533e-08	2.31137e-06	8.6752	2.03003
Myl12a	1.02147	14.0509	4.60798	0.000271548	0.00159941	0.018208	2.02999
Chka	1.02047	7.90155	9.01274	9.08663e-08	3.31951e-06	8.14019	2.02858
Adamts15	1.01971	8.87306	3.52856	0.00268985	0.0105007	-2.26917	2.02751
Rela	1.01937	12.7698	6.75339	4.00394e-06	5.53282e-05	4.2938	2.02704
Nktr	1.01837	10.8171	11.4863	2.82954e-09	3.20528e-07	11.6317	2.02562
Rin2	1.01563	9.39987	6.5776	5.52958e-06	7.19696e-05	3.96532	2.02178
Zkscan17	1.01561	10.9674	5.95924	1.78004e-05	0.000181128	2.77644	2.02175
Safb	1.01255	10.3323	8.64548	1.60922e-07	5.07347e-06	7.561	2.01748
Pvr	1.01176	8.83115	5.07477	0.000103416	0.000734276	0.992252	2.01637
Dnttip2	1.01173	12.7084	6.01617	1.59493e-05	0.000165384	2.88803	2.01632
Tmem86a	1.00996	9.33734	4.81476	0.000176577	0.00112249	0.451889	2.01385
Tmem167b	1.00993	9.73011	10.0207	2.04853e-08	1.20249e-06	9.6453	2.01381
Ivd	1.00977	12.672	7.09396	2.16808e-06	3.44558e-05	4.91802	2.01359
LOC105247169	1.00897	12.4433	8.07267	4.05481e-07	1.00132e-05	6.62291	2.01248
Prkcd	1.00893	9.72201	3.96734	0.00105271	0.00482387	-1.3392	2.01241
Brpf1	1.00805	11.3124	7.57746	9.32237e-07	1.8111e-05	5.77666	2.01119
Osbpl10	1.00698	9.20143	7.30483	1.49463e-06	2.58857e-05	5.29648	2.0097
Sertad1	1.00614	10.5937	4.01994	0.000941035	0.00438849	-1.22741	2.00853
Dhx36	1.00568	9.34263	8.01908	4.43035e-07	1.05656e-05	6.53292	2.00789
Fiz1	1.00494	9.35305	8.41484	2.32328e-07	6.70563e-06	7.18844	2.00686
Herpud1	1.0025	12.592	6.28842	9.49132e-06	0.000110011	3.41573	2.00347
Hnrnpf	1.00164	10.3632	8.84546	1.17652e-07	4.03325e-06	7.87849	2.00227
Mpp5	1.00107	9.69295	8.35924	2.5408e-07	7.08224e-06	7.09759	2.00149
Adck3	1.00041	11.3126	4.63781	0.000255136	0.00151881	0.0809659	2.00056
