# Supplementary material for: Defective excitation-contraction coupling and mitochondrial respiration precede mitochondrial Ca2+ accumulation in spinobulbar muscular atrophy skeletal muscle
Source: Research Square preprint supplement (doi:10.21203/rs.3.rs-1261384/v1), 2022-01-27
Supplement: Supplementary file 1 [file ee3f9eeba039c635dcbb9ef3.docx]

**Supplementary table 3**

Description of control subjects and SBMA patients.

| Controls | External ID | Age | Age of Onset | Muscle | Clinical Status | AR Q length |
| --- | --- | --- | --- | --- | --- | --- |
| 1 | 9931 | 37 | N/A | quadriceps femoris | no | N/A |
| 2 | 9161 | 42 | N/A | vastus lateralis | no | N/A |
| 3 | 5930 | 52 | N/A | vastus lateralis | mild myopathic signs | N/A |
| 4 | ORTHO11 | 61 | N/A | vastus lateralis | no | N/A |
| 5 | ORTHO13 | 49 | N/A | vastus lateralis | no | N/A |
| 6 | ORTHO12 | 56 | N/A | vastus lateralis | no | N/A |
| 7 | ORTHO10 | 76 | N/A | vastus lateralis | no | N/A |
| Kennedy’s Disease | External ID | Age | Age of Onset | Muscle | Clinical Status | AR Q length |
| 1 | 51788 | 54 | 60 | quadriceps femoris | SBMA | 44 |
| 2 | 53355 | 51 | 48 | vastus lateralis | SBMA | 44 |
| 3 | 53293 | 54 | 45 | vastus lateralis | SBMA | 49 |
| 4 | 51766 | 71 | 64 | vastus lateralis | SBMA | 44 |
| 5 | 52176 | 45 | 41 | vastus lateralis | ­­SBMA | 47 |

**Supplementary table 4**

Primers used for quantitative real-time PCR analyses.

|  | | | |
| --- | --- | --- | --- |
|  | | FW | RV |
| *Cacna1s* | | CAGACACAGAGAGCTTGTATGAA | TTCACTAGGTCATGGCACTTC |
| *Casq1* | | CCCTGTAGAGTTGATTGAAGGTGAACG | CCTCGTAGGCTTTGTAATGCTCTGAGTC |
| *Casq2* | | CCAGCTGAAGGAGATTGTACTG | AGCAAGCTTGGCCTCTTT |
| *Atp2a1* | | CCACCAACCAGATGTCAGTT | TCCCTCAGGAGCATAAGTAGAG |
| *Atp2a2* | | CTTATCTTGGTAGCCAATGCAATC | TTGCCCATTTCAGGCTCATA |
| *Pv* | | AGGTGAAGAAGGTGTTCCATATT | TCTCTGGCATCTGAGGAGGAA |
| *Sln* | | GCTCCTCTTCAGGAAGTGAAG | TGGCCCCTCAGTATTGGTAGG |
| *Ryr1* | | GCAACCGCCTTTGCTTTC | ACTGACAGAGACTGCTCCA |
| *Gss* | | GGACTTCAACATACTGGTGGAT | CAAAGAGACGGGCAGTATAGTC |
| *Gsr* | | GGACGGGACCCAAATTCTAA | GACGCCTTTGACATTGGTATTC |
| *Nfe2l1* | | CAGCAGTGGCAAGATCTCAT | GGGCATTGTACAGAATCTCACT |
| *Nfe2l2* | | CAGGAGAATTCCTCCCAATTCA | GGCATCTTGTTTGGGAATGTG |
| *Nrf1* | | GCGATTGTACTCTGCATCTCA | TTTGTCCACAGAGACTGGAATC |
| *Nrf2* | | GATCAGGCGACATGTTAACGTT | AGAGCCCAGTCAAACCCTTTC |
| *Nqo1* | | CATGTACTCTCTTCAGGGTGTC | CAATGCTGTAAACCAGTTGAGG |
| *Tfam* | | AGCACTGGTAAAGAGAAGAGAATTA | CGAATCATCCTTTGCCTCCT |
| *Sdha* | | TTACCTGCGTTTCCCCTCAT | AAGTCTGGCGCAACTCAATC |
| *Mpc2* | | CCGACTCATGGATAAAGTGGAG | CCATTTCATTATTGGAGCCCAGA |
| *Cpt1* | | CTGCACTCCTGGAAGAAGAAG | CTGTGCACTGAGGTATCTCTTC |
| *Fkbp12* | | GTGATCCGAGGCTGGGAGGAAG | GGCTCCATAGGCATAGTCTGAGGAGA |
| *Stac3* | | CACTCTACAGCGACCAACAGTA | CACTCTACAGCGACCAACAGTA |
| *Junctin* | | CATGGTTCATGGTCATTGCATTGC | TCAAAGTCTCCATCGCCATCCG |
| *Triadin* | | GCACCCACCATGACTGAGATCAC | AGCACCTTTCCAGGGGATTTAGG |
| *B-actin* | | GACAGGATGCAGAAGGAGATTACTG | CTCAGGAGGAGCAATGATCTTGAT |

**
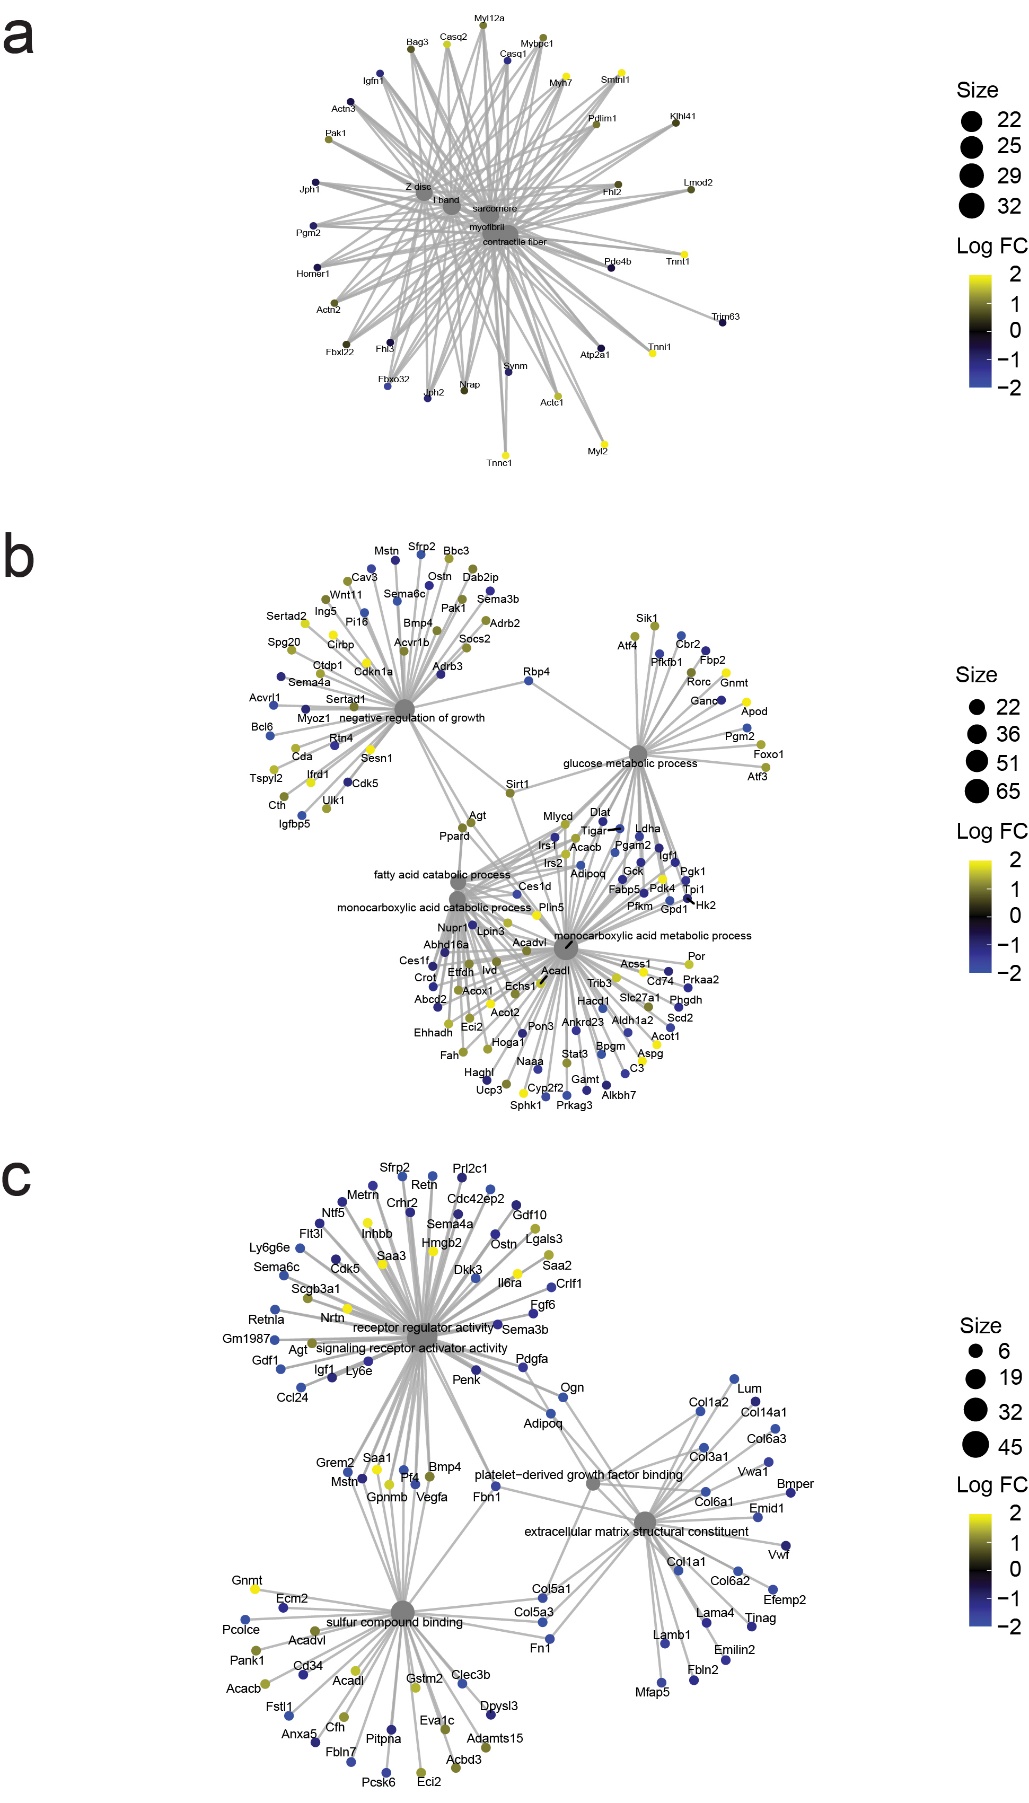
**

**Supplementary Figure 1: Early altered expression of genes involved in muscle structure, contraction and metabolism.**

Gene onthology analysis of differentially expressed genes in 24-week-old (a) and 12-week-old AR113Q (b, c) AR113Q mice compared to control mice (n = 3 mice/genotype).

**
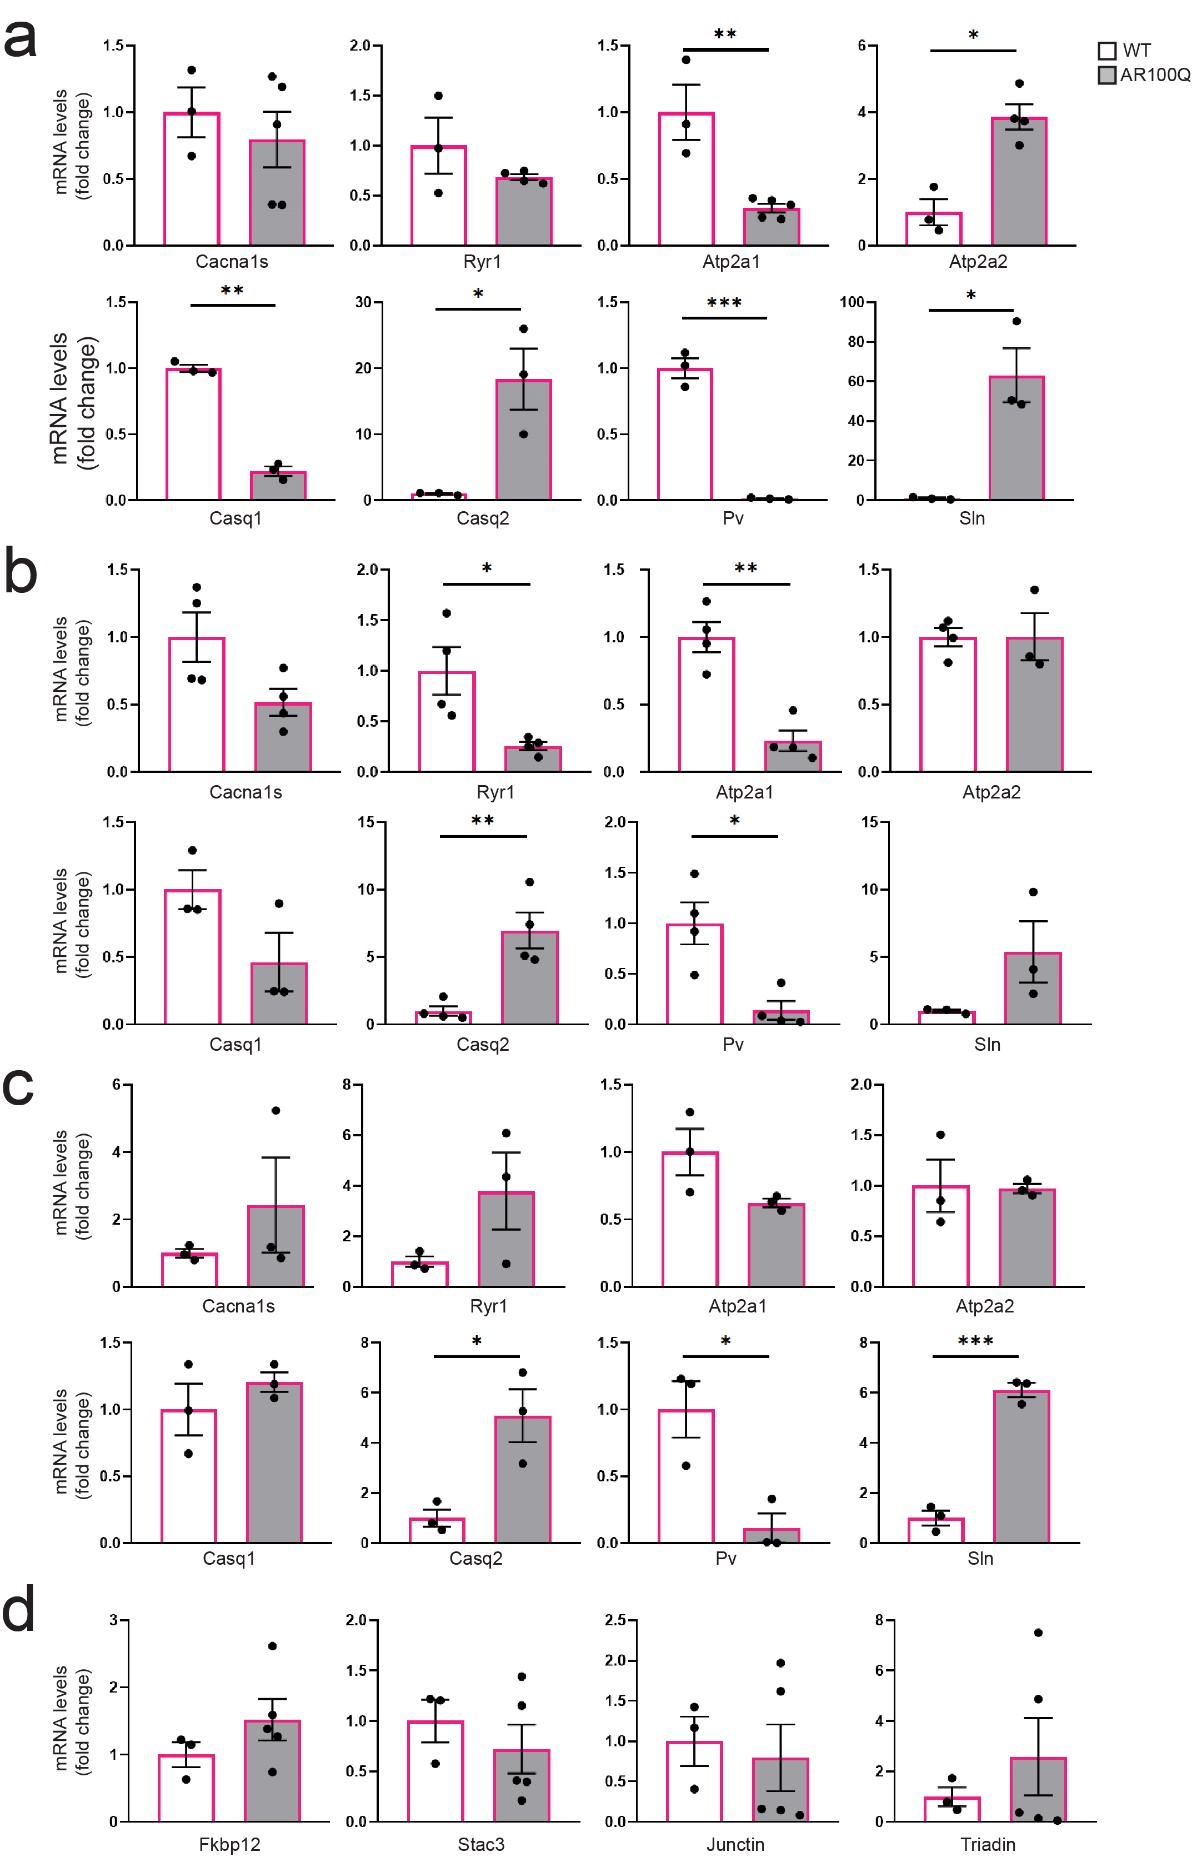
**

**Supplementary Figure 2: Altered expression of ECC genes in fast-twitch muscles of AR100Q mice.**

a-d) RT-PCR analysis of the indicated genes normalized to *beta-actin* in the EDL (a), FDB (b), soleus (c), and quadriceps (d) muscles of 8-week-old WT and AR100Q mice. Graphs show mean ± SEM, n = 3-5 mice/genotype, student’s t test, * p = 0.05, ** p = 0.01, *** p = 0.001.

**
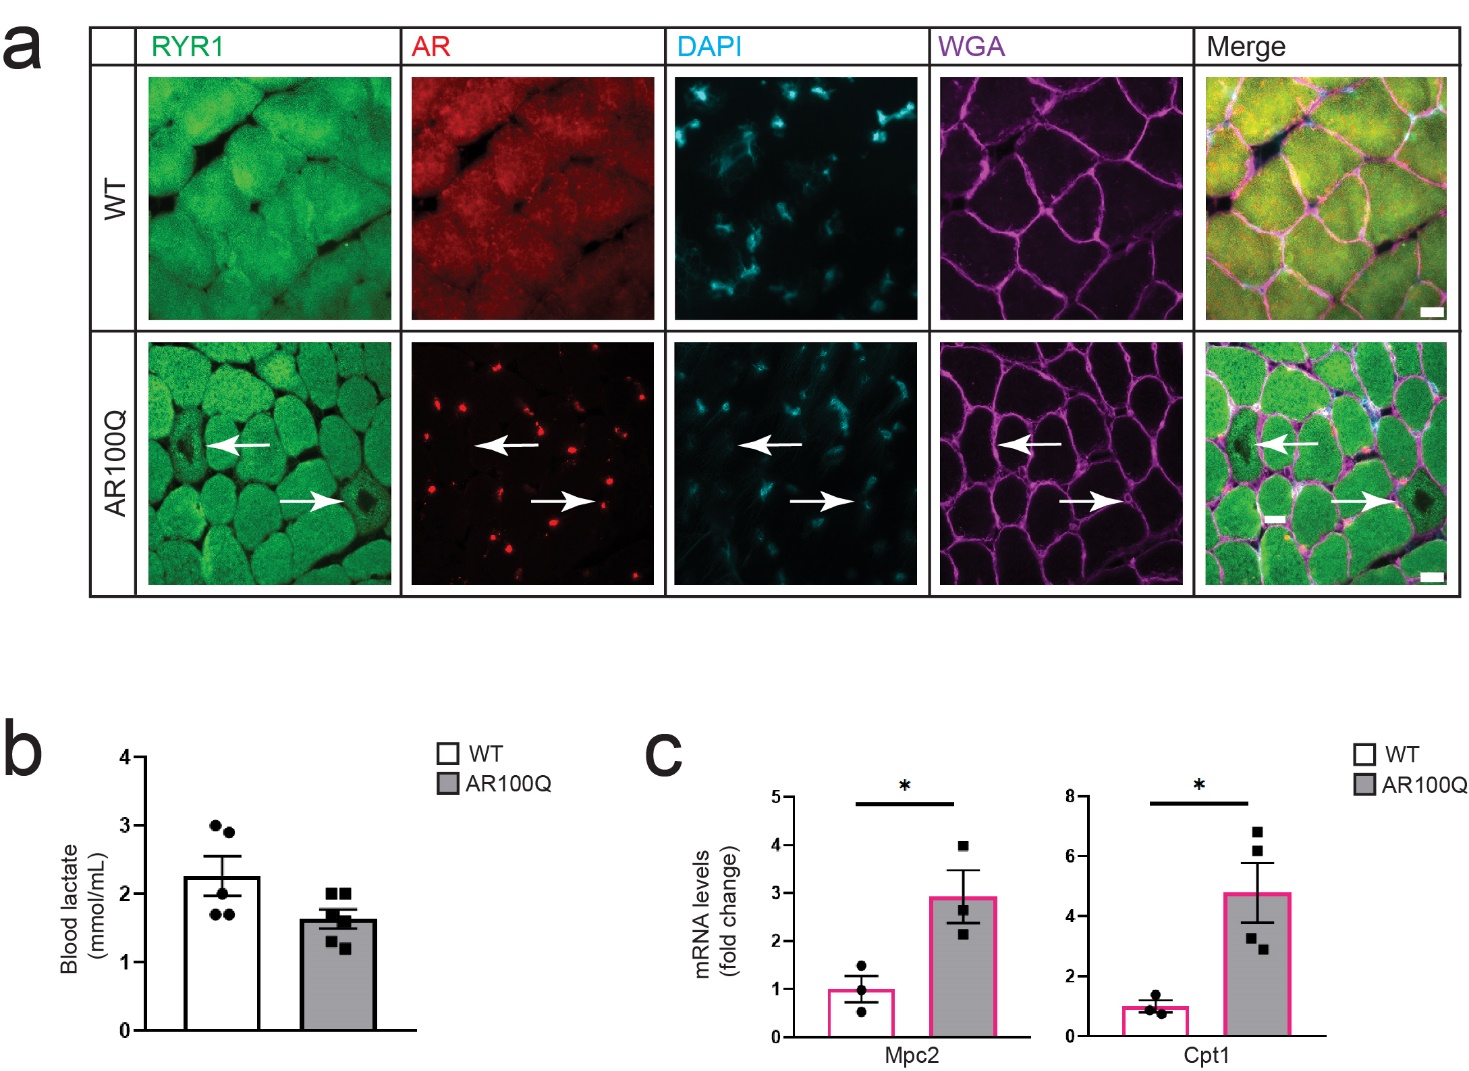
**

**Supplementary Figure 3: Core-like pathology and normal lactate levels in the bloodstream of AR100Q mice.**

a)Immunofluorescence analysis of RYR1 (green), AR (red), nuclei (DAPI, blue), and wheat germ agglutinin (WGA, purple) in the quadriceps muscle of 8-week-old WT and AR100Q mice (n = 3 mice/genotype). Shown are representative images of 3 biological replicates. Bar, 20 μm. Arrows point to fibers with areas deprived of RYR1. b) Blood lactate level analysis in 12-week-old mice (n = 3-5 mice/genotype). c)RT-PCR analysis of the transcript levels of the indicated genes normalized to *beta-actin* in the quadriceps muscle of 8-week-old WT and AR100Q mice (n = 3-5 mice/genotype). Graphs show mean ± SEM, student’s t-test; * p < 0.05.

**
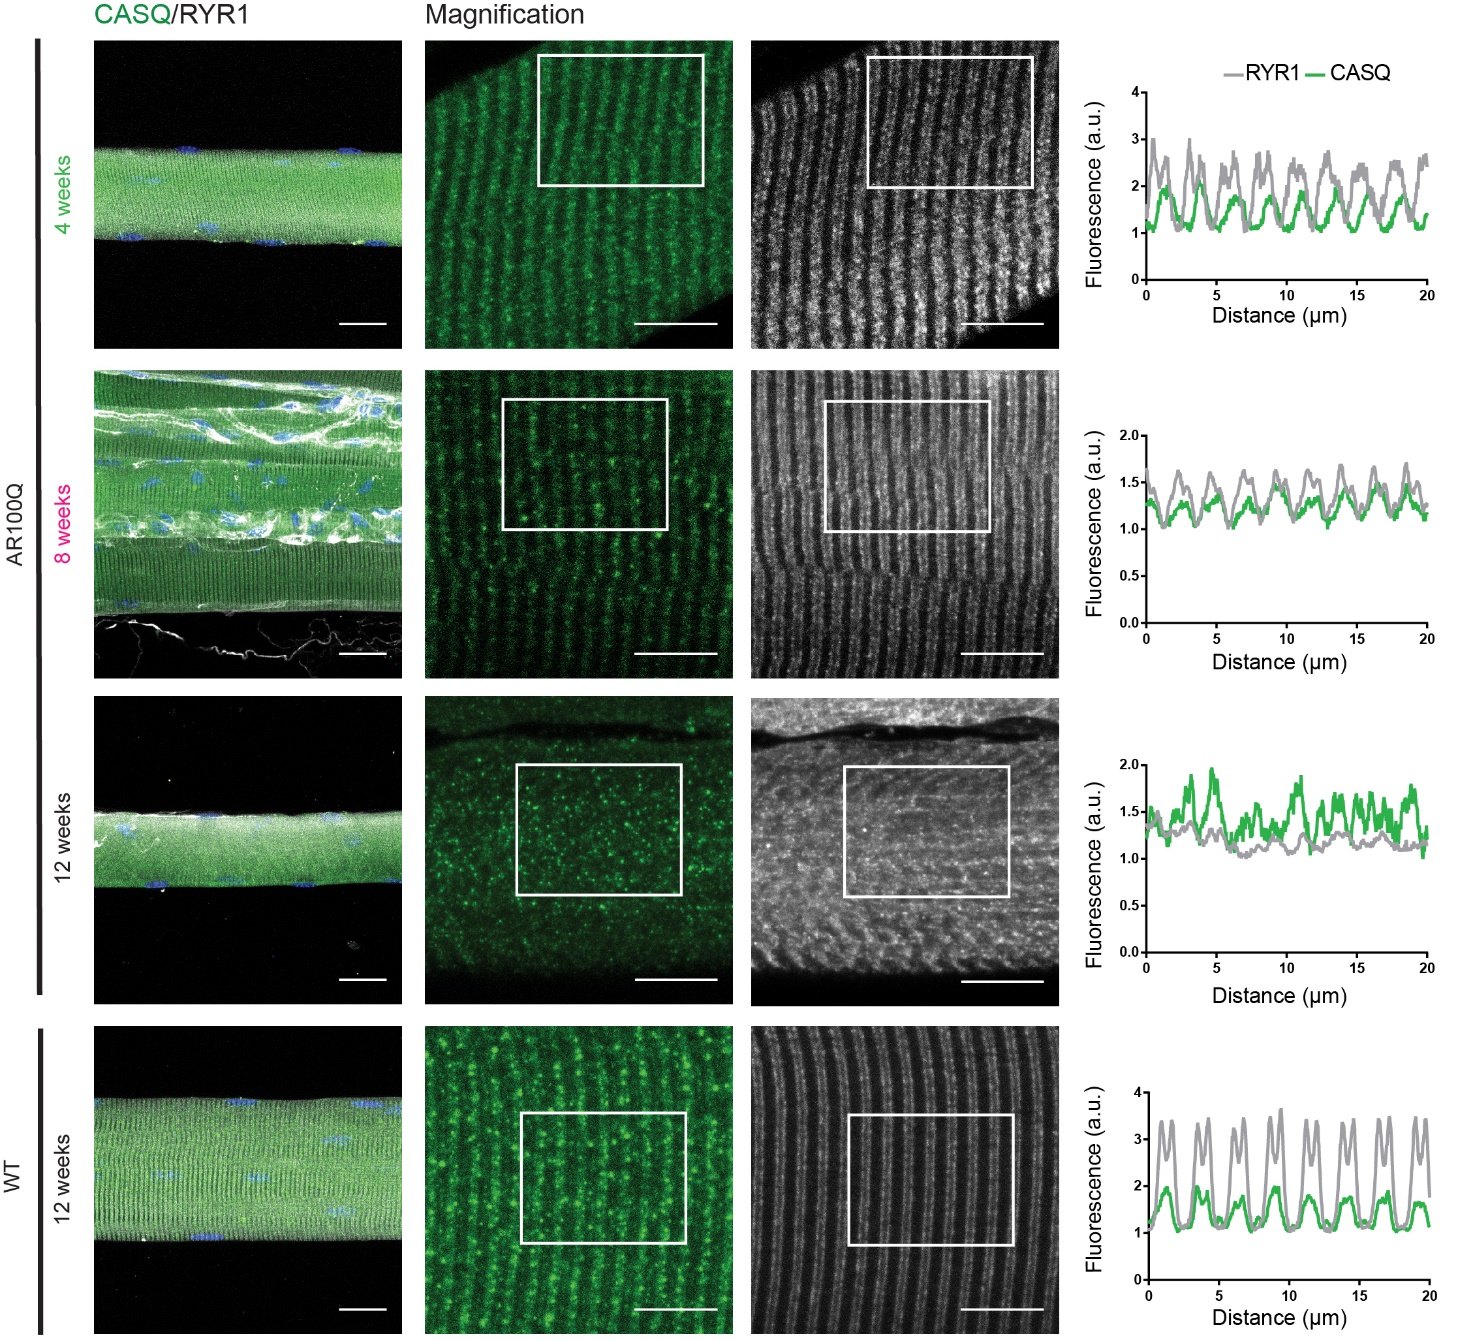
**

**Supplementary Figure 4: Disrupted sarcomere organization in the muscle of SBMA mice.**

Immunofluorescence and confocal microscopy analysis of RYR1 (white) and CASQ (green) in fibers isolated from the TA muscle of WT and AR100Q mice (n = 3 mice/genotype). Shown are representative images. Bar = 25 μm, magnification bar = 10 μm. Graphs show fluorescence quantification (described in the Methods section).

**
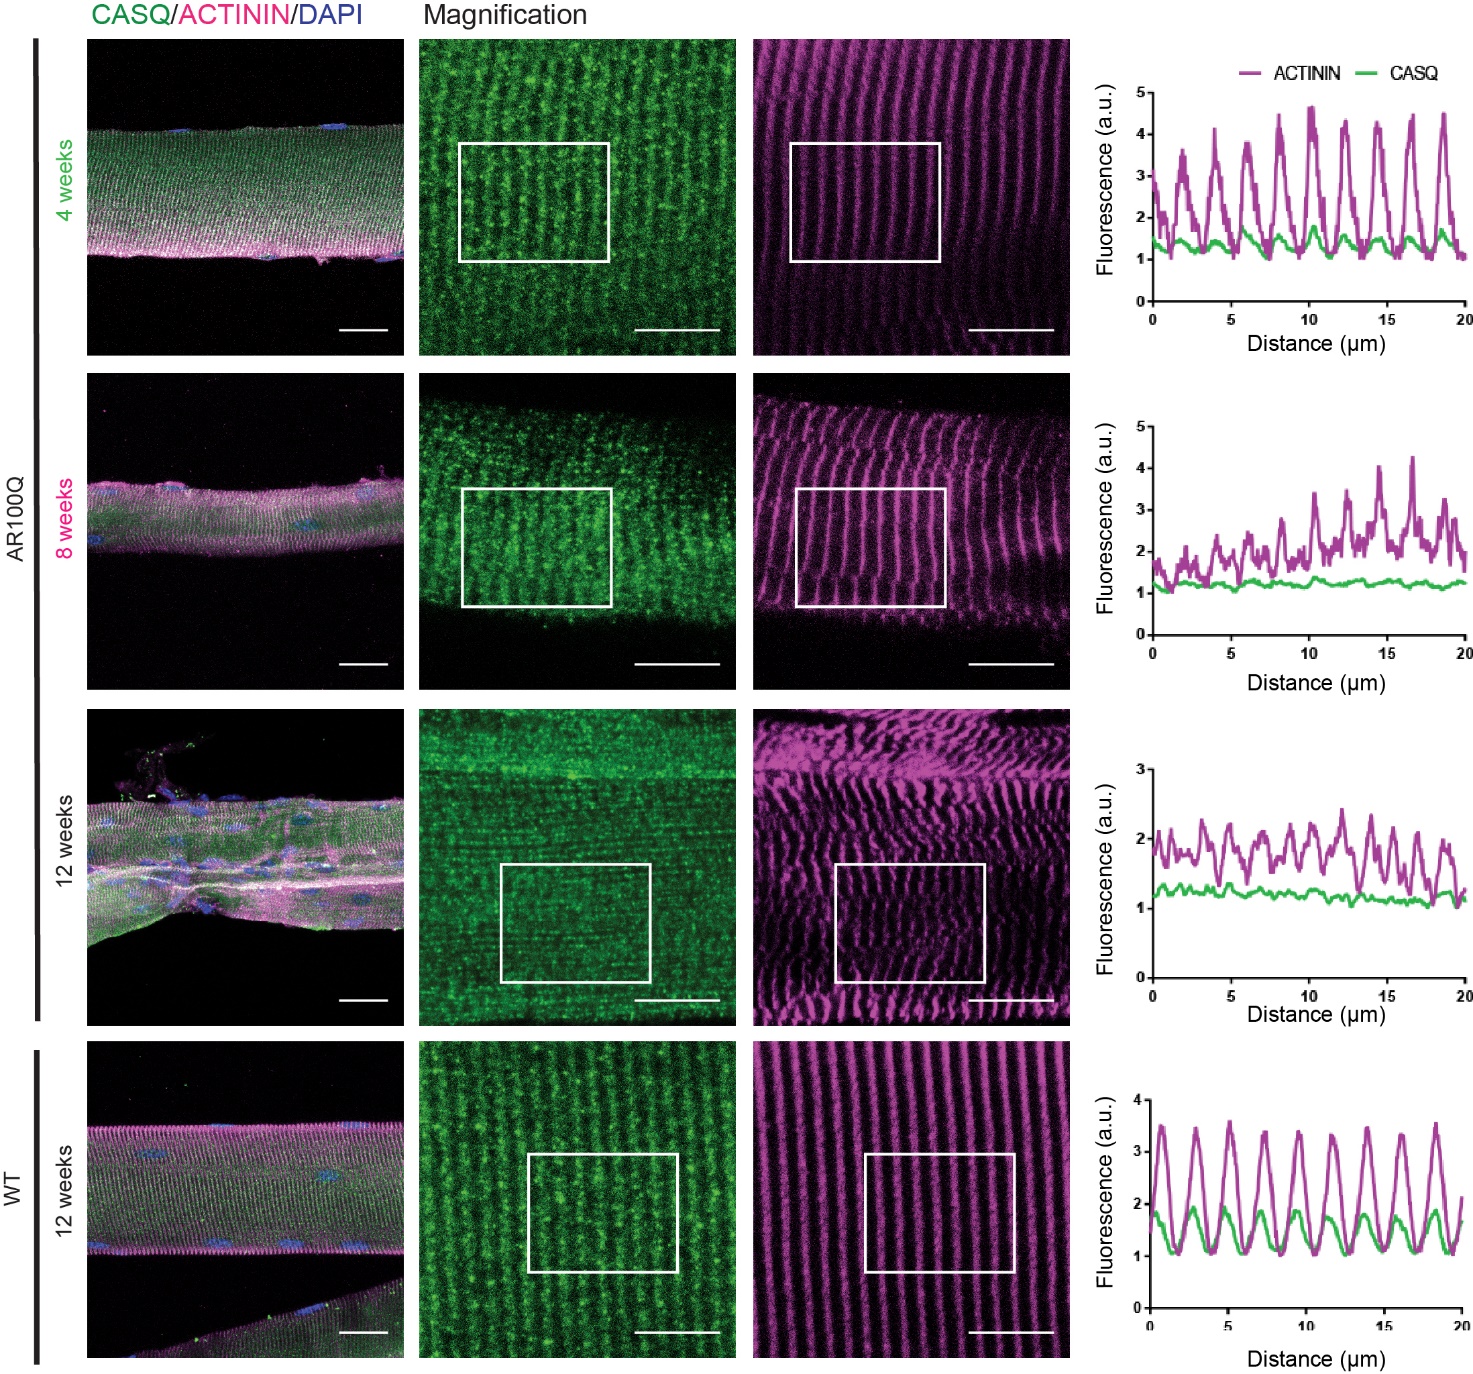
**

**Supplementary Figure 5: Disruption of myofiber organization in SBMA mice.**

Immunofluorescence and confocal microscopy analysis of Actinin (purple), CASQ (green), and DAPI (blue) in myofibers isolated from the TA muscle of WT and AR100Q mice (n = 3 mice/genotype). Shown are representative images. Bar = 25 μm, Magnification bar = 10 μm. Graphs show fluorescence quantification (see Methods).

**
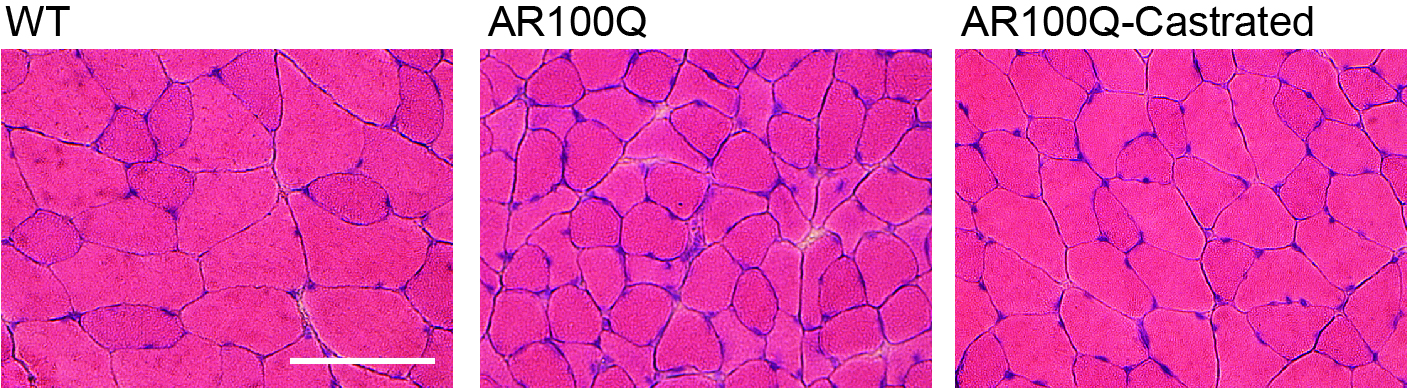
**

**Supplementary Figure 6:** **Amelioration of muscle pathology by surgical castration.**

Haematoxylin and eosin analysis of the quadriceps muscle of 8-week-old WT and AR100Q mice (n = 3 mice/genotype). Shown are representative images. Bar = 100 μm.


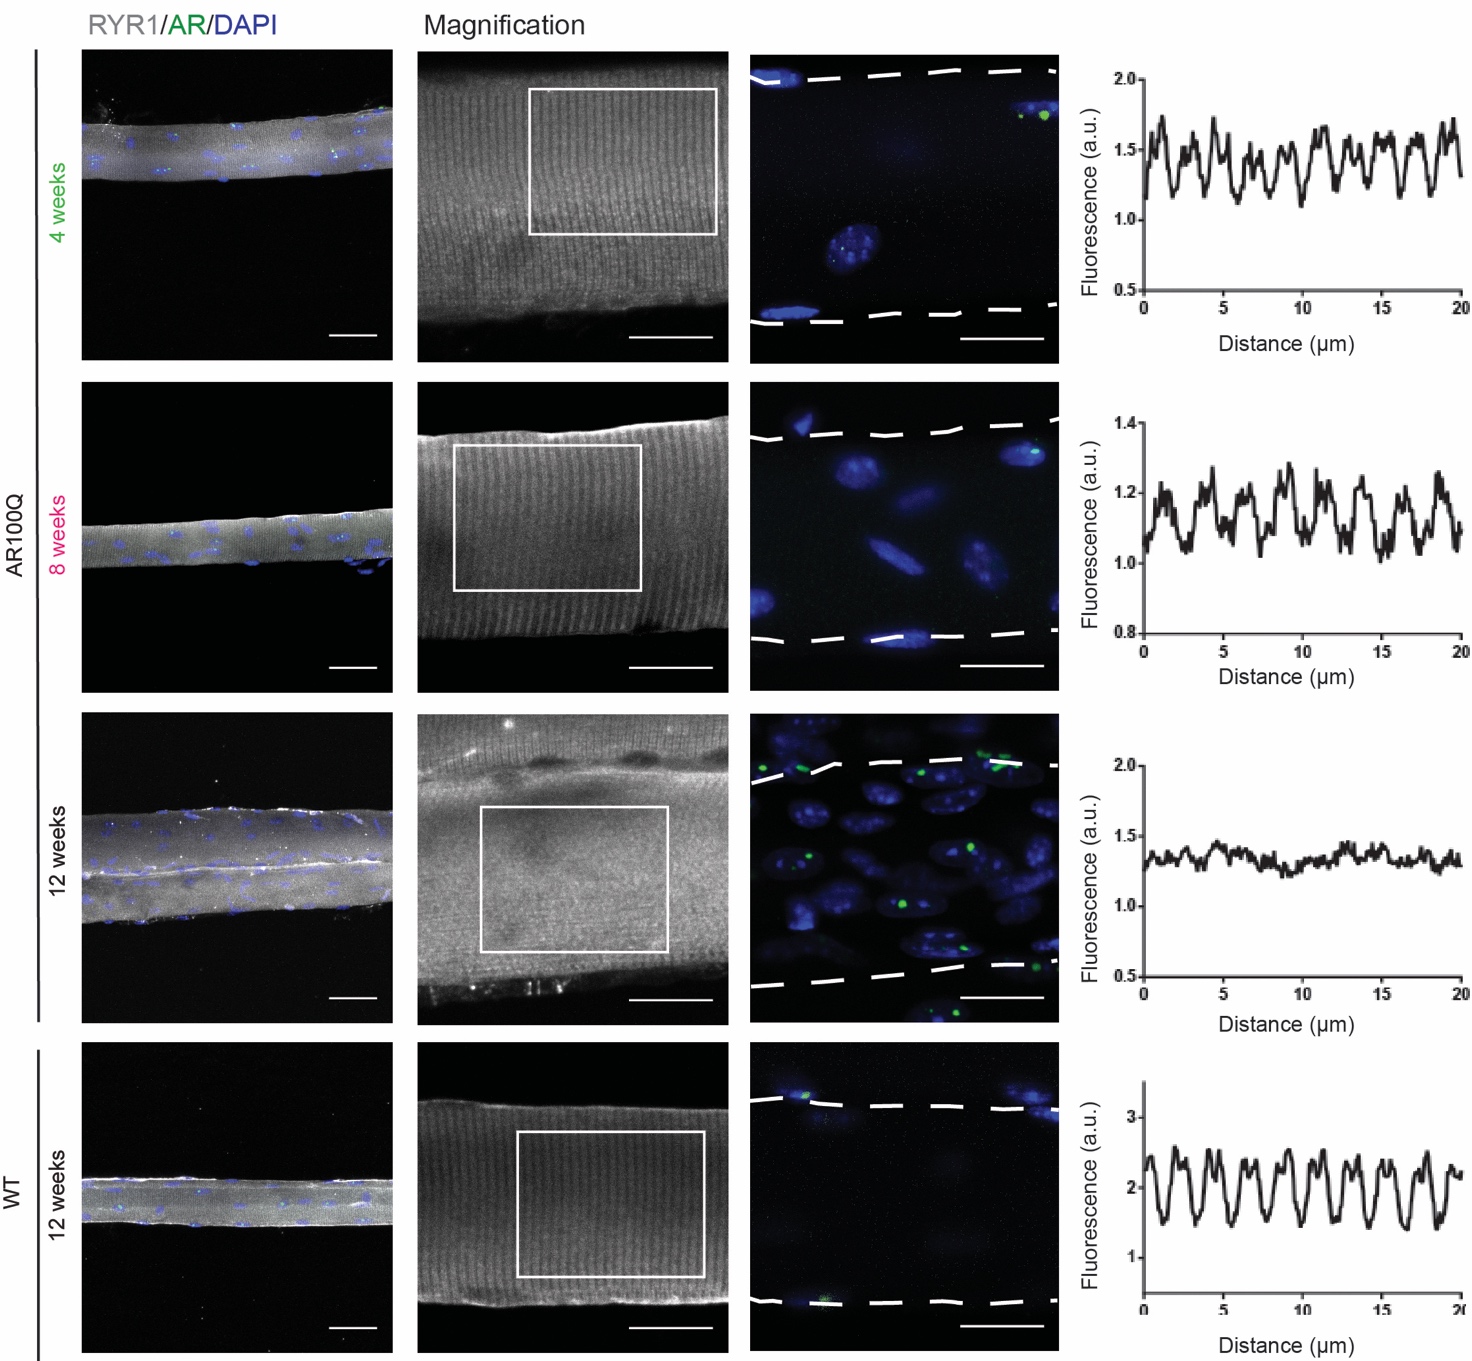


**Supplementary Figure 7:** **Amelioration of myofiber organization by surgical castration.**

Immunofluorescence analysis of RYR (grey), AR (green), and DAPI (blue) in myofibers isolated from the TA muscle of WT and AR100Q mice (n = 3 mice/genotype). Shown are representative images. Bar = 25 μm, Magnification bar = 10 μm. Graphs show fluorescence quantification (see Methods).
