# Supplementary material for: Defective excitation-contraction coupling and mitochondrial respiration precede mitochondrial Ca2+ accumulation in spinobulbar muscular atrophy skeletal muscle
Source: Research Square preprint supplement (doi:10.21203/rs.3.rs-1261384/v1), 2022-01-27
Supplement: Supplementary file 3 [file f0656b6ff7c30e102a184b80.xlsx]

## Sheet: GO CC
ID	Description	GeneRatio	BgRatio	pvalue	p.adjust	qvalue	geneID	Count
GO:0030016	myofibril	37/1063	209/15508	8.34566e-08	2.55645e-05	2.43215e-05	Smtnl2/Trim32/Homer1/Pdlim2/Nexn/Myoz3/Myod1/Abra/Synm/Tmod4/Pdlim7/Casq1/Flna/Lmod3/Cav3/Jph2/Timp4/Xirp2/Twf2/Ank1/Myoz1/Myl1/Pdlim3/Ky/Myl9/Ldb3/Ak1/Palld/Anxa5/Myl12a/Nrap/Ankrd2/Tpm2/Ankrd23/Pak1/Itgb1bp2/Smtnl1	37
GO:0030017	sarcomere	34/1063	185/15508	1.09547e-07	2.55645e-05	2.43215e-05	Smtnl2/Trim32/Homer1/Pdlim2/Nexn/Myoz3/Abra/Synm/Tmod4/Pdlim7/Casq1/Flna/Lmod3/Cav3/Jph2/Timp4/Xirp2/Ank1/Myoz1/Pdlim3/Ky/Myl9/Ldb3/Ak1/Palld/Anxa5/Myl12a/Nrap/Ankrd2/Tpm2/Ankrd23/Pak1/Itgb1bp2/Smtnl1	34
GO:0043292	contractile fiber	38/1063	222/15508	1.39189e-07	2.55645e-05	2.43215e-05	Smtnl2/Trim32/Homer1/Pdlim2/Trim63/Nexn/Myoz3/Myod1/Abra/Synm/Tmod4/Pdlim7/Casq1/Flna/Lmod3/Cav3/Jph2/Timp4/Xirp2/Twf2/Ank1/Myoz1/Myl1/Pdlim3/Ky/Myl9/Ldb3/Ak1/Palld/Anxa5/Myl12a/Nrap/Ankrd2/Tpm2/Ankrd23/Pak1/Itgb1bp2/Smtnl1	38
GO:0031674	I band	27/1063	137/15508	5.2473e-07	7.22816e-05	6.87673e-05	Smtnl2/Homer1/Pdlim2/Nexn/Myoz3/Synm/Pdlim7/Casq1/Flna/Cav3/Jph2/Xirp2/Ank1/Myoz1/Pdlim3/Ky/Myl9/Ldb3/Palld/Anxa5/Myl12a/Nrap/Ankrd2/Ankrd23/Pak1/Itgb1bp2/Smtnl1	27
GO:0062023	collagen-containing extracellular matrix	48/1063	333/15508	7.42487e-07	8.18221e-05	7.78439e-05	Ctsl/Runx1/Vegfa/Lgals4/Ogn/Efemp2/Ecm2/Col6a3/Fbln2/Lox/Pf4/Col6a2/Col6a1/Col3a1/Vwa1/Gpc1/Tinag/Anxa2/S100a11/Angptl6/Lama4/Col5a3/Myoc/Emid1/Lum/Sod3/Emilin2/Sparcl1/Mfap5/Bmper/Col5a1/Lamb1/S100a10/Igf1/Col1a1/Vwf/Serpinh1/Anxa5/Pcsk6/Fbn1/Fn1/Col14a1/Col1a2/Cilp/Adamtsl4/Serpinf1/Adamts15/Lgals3	48
GO:0031012	extracellular matrix	55/1063	424/15508	3.45887e-06	0.000292519	0.000278297	Ctsl/Runx1/Vegfa/Lgals4/Clec3b/Ogn/Efemp2/Ecm2/Col6a3/Fbln2/Lox/Pf4/Col6a2/Col6a1/Col3a1/Vwa1/Gpc1/Tinag/Lingo3/Anxa2/S100a11/Wnt11/Angptl6/Lama4/Col5a3/Myoc/Emid1/Lum/Timp4/Fbln7/Sod3/Emilin2/Sparcl1/Lrrc17/Mfap5/Lingo4/Bmper/Col5a1/Lamb1/S100a10/Igf1/Col1a1/Vwf/Serpinh1/Anxa5/Pcsk6/Fbn1/Fn1/Col14a1/Col1a2/Cilp/Adamtsl4/Serpinf1/Adamts15/Lgals3	55
GO:0030312	external encapsulating structure	55/1063	425/15508	3.71622e-06	0.000292519	0.000278297	Ctsl/Runx1/Vegfa/Lgals4/Clec3b/Ogn/Efemp2/Ecm2/Col6a3/Fbln2/Lox/Pf4/Col6a2/Col6a1/Col3a1/Vwa1/Gpc1/Tinag/Lingo3/Anxa2/S100a11/Wnt11/Angptl6/Lama4/Col5a3/Myoc/Emid1/Lum/Timp4/Fbln7/Sod3/Emilin2/Sparcl1/Lrrc17/Mfap5/Lingo4/Bmper/Col5a1/Lamb1/S100a10/Igf1/Col1a1/Vwf/Serpinh1/Anxa5/Pcsk6/Fbn1/Fn1/Col14a1/Col1a2/Cilp/Adamtsl4/Serpinf1/Adamts15/Lgals3	55
GO:0030018	Z disc	23/1063	124/15508	1.03735e-05	0.000714478	0.00067974	Homer1/Pdlim2/Nexn/Myoz3/Synm/Pdlim7/Casq1/Flna/Cav3/Jph2/Xirp2/Ank1/Myoz1/Pdlim3/Ky/Myl9/Ldb3/Palld/Anxa5/Myl12a/Nrap/Pak1/Itgb1bp2	23
GO:1902911	protein kinase complex	19/1063	92/15508	1.23129e-05	0.000753824	0.000717173	Ccno/Cdkn1a/Prkaa2/Cdk5/Igf1r/Phkg2/Phkg1/Ccnd1/Atg13/Prkag3/Ulk1/Phka1/Acvr1b/Uvrag/Irs1/Ccnd2/Ccng1/Cnppd1/Amhr2	19
GO:0005583	fibrillar collagen trimer	6/1063	11/15508	3.50232e-05	0.00175435	0.00166905	Col3a1/Col5a3/Lum/Col5a1/Col1a1/Col1a2	6
GO:0098643	banded collagen fibril	6/1063	11/15508	3.50232e-05	0.00175435	0.00166905	Col3a1/Col5a3/Lum/Col5a1/Col1a1/Col1a2	6
GO:1902554	serine/threonine protein kinase complex	15/1063	76/15508	0.000170093	0.00781011	0.00743039	Ccno/Cdkn1a/Cdk5/Phkg2/Phkg1/Ccnd1/Atg13/Ulk1/Phka1/Acvr1b/Uvrag/Ccnd2/Ccng1/Cnppd1/Amhr2	15
GO:0005581	collagen trimer	14/1063	70/15508	0.000240166	0.0101794	0.00968444	Col6a3/Lox/Col6a2/Col6a1/Col3a1/Col5a3/Emid1/Lum/Emilin2/Col5a1/Col1a1/Col14a1/Col1a2/Adipoq	14
GO:0005811	lipid droplet	15/1063	80/15508	0.00030718	0.0120897	0.0115019	Sigmar1/Atg2a/Abhd4/Ctdnep1/Spg20/Rab3gap1/Anxa2/Plin4/Plin5/Ces1d/Pnpla7/Pnpla2/Hsd3b7/Cidea/Ces1f	15
GO:0000502	proteasome complex	12/1063	58/15508	0.000475317	0.01746	0.0166111	Zfand2a/Psmb8/Psmc1/Psmb9/Ubqln1/Psmd11/Psmc4/Psmb3/Psma5/Psmd3/Psmd4/Psmd1	12
GO:0042383	sarcolemma	23/1063	160/15508	0.000574942	0.0197996	0.0188369	Cacng6/Col6a3/Clcn1/Igf1r/Synm/Col6a2/Col6a1/Bves/Casq1/Kcnj12/Anxa2/Cav3/Fas/Stbd1/Ank1/Fgf6/Popdc2/Cacng1/Cib2/Adrb2/Anxa5/Atp1b1/Aqp4	23
GO:0098644	complex of collagen trimers	6/1063	17/15508	0.000656049	0.0212637	0.0202299	Col3a1/Col5a3/Lum/Col5a1/Col1a1/Col1a2	6
GO:0005773	vacuole	51/1063	477/15508	0.00103141	0.0315726	0.0300375	Ctsl/Rab9/Sidt2/Slc39a14/Trp53inp1/Gabarapl1/Naaa/Atp6v1h/Neu1/Laptm4b/Bri3/Nbr1/Tmem25/Cd34/Hgs/Arl8a/Ubqln1/Map1lc3b/Rab3a/Tinag/Sppl2b/Anxa2/Ulk1/Bace1/Uvrag/Sqstm1/Slc46a3/Pip4k2c/Got1/Atp13a2/Napb/Tmbim1/H2-DMb1/Npc1/Srpx/Mt1/Bbc3/Il4i1/Epdr1/Thbd/Prkcd/Ctsh/Ifi30/Ffar4/H2-Eb1/Ctla2a/Arrdc3/Acp5/Cd74/H2-Aa/Ctla2b	51
GO:1905369	endopeptidase complex	12/1063	64/15508	0.00119764	0.0347316	0.0330429	Zfand2a/Psmb8/Psmc1/Psmb9/Ubqln1/Psmd11/Psmc4/Psmb3/Psma5/Psmd3/Psmd4/Psmd1	12
